# Supplementary material for: What Happens After Menopause? (WHAM): protocol for a prospective, multicentre, age-matched cohort trial of risk-reducing bilateral salpingo-oophorectomy in high-risk premenopausal women
Source: PubMed Central journal article supplement — BMJ Open. 2017 Nov 14;7(11):e018758. doi: 10.1136/bmjopen-2017-018758 (PMC5695307; doi:10.1136/bmjopen-2017-018758), 2017-11-14
Supplement: bmjopen-2017-018758.draft_revisions.pdf [file bmjopen-2017-018758.draft_revisions.pdf]

# BMJ Open

BMJ Open is committed to open peer review. As part of this commitment we make the peer review history of every article we publish publicly available.

When an article is published we post the peer reviewers' comments and the authors' responses online. We also post the versions of the paper that were used during peer review. These are the versions that the peer review comments apply to.

The versions of the paper that follow are the versions that were submitted during the peer review process. They are not the versions of record or the final published versions. They should not be cited or distributed as the published version of this manuscript.

BMJ Open is an open access journal and the full, final, typeset and author-corrected version of record of the manuscript is available on our site with no access controls, subscription charges or pay-per-view fees (<http://bmjopen.bmj.com>).

If you have any questions on BMJ Open's open peer review process please email [editorial.bmjopen@bmj.com](mailto:editorial.bmjopen@bmj.com)

# BMJ Open

## What Happens after Menopause? (WHAM): Protocol for a prospective multicentre, age-matched cohort trial of risk-reducing bilateral salpingo-oophorectomy in high-risk premenopausal women

|                                 |                                                                                                                                                                                                                                                                                                                                                                                                                                                                                                                                                                                                          |
|---------------------------------|----------------------------------------------------------------------------------------------------------------------------------------------------------------------------------------------------------------------------------------------------------------------------------------------------------------------------------------------------------------------------------------------------------------------------------------------------------------------------------------------------------------------------------------------------------------------------------------------------------|
| Journal:                        | <i>BMJ Open</i>                                                                                                                                                                                                                                                                                                                                                                                                                                                                                                                                                                                          |
| Manuscript ID                   | bmjopen-2017-018758                                                                                                                                                                                                                                                                                                                                                                                                                                                                                                                                                                                      |
| Article Type:                   | Protocol                                                                                                                                                                                                                                                                                                                                                                                                                                                                                                                                                                                                 |
| Date Submitted by the Author:   | 20-Jul-2017                                                                                                                                                                                                                                                                                                                                                                                                                                                                                                                                                                                              |
| Complete List of Authors:       | Hickey, Martha ; University of Melbourne, Obstetrics & Gynaecology Trainer, Alison; University of Melbourne, Department of Medicine; Peter MacCallum Cancer Institute<br>Braat, Sabine ; University of Melbourne School of Population and Global Health, Centre for Epidemiology and Biostatistics<br>Davey, Mary-Ann; Monash University Central Clinical School, Obstetrics & Gynaecology, Monash Health<br>Krejany, Efrosinia; Royal Women's Hospital, Gynaecology Research Centre<br>Wark, John; University of Melbourne, Department of Medicine; Royal Melbourne Hospital, Bone and Mineral Medicine |
| <b>Primary Subject Heading</b>: | Obstetrics and gynaecology                                                                                                                                                                                                                                                                                                                                                                                                                                                                                                                                                                               |
| Secondary Subject Heading:      | Obstetrics and gynaecology                                                                                                                                                                                                                                                                                                                                                                                                                                                                                                                                                                               |
| Keywords:                       | Menopause, Ovarian cancer, RRBSO                                                                                                                                                                                                                                                                                                                                                                                                                                                                                                                                                                         |
|                                 |                                                                                                                                                                                                                                                                                                                                                                                                                                                                                                                                                                                                          |

SCHOLARONE™  
Manuscripts

1  
2  
3 **What Happens after Menopause? (WHAM): Protocol for a prospective multicentre,**  
4 **age-matched cohort trial of risk-reducing bilateral salpingo-oophorectomy in high-risk**  
5 **premenopausal women**  
6

7 **AUTHORS AND AUTHOR INFORMATION**  
8

9 M Hickey MD, Department of Obstetrics and Gynaecology, University of Melbourne and the  
10 Royal Women's Hospital, Victoria, Australia. hickeym@unimelb.edu.au  
11

12 Alison H. Trainer MBChB, PhD, Parkville Familial Cancer Centre, Peter MacCallum Cancer  
13 centre and University of Melbourne Department of Medicine  
14

15 Sabine Braat MSc, Melbourne School of Population and Global Health and Melbourne  
16 Clinical and Translational Sciences (MCATS), University of Melbourne, Parkville, Australia  
17

18 Mary-Ann Davey DrPH, Department of Obstetrics and Gynaecology, Monash University  
19

20  
21 EO Krejany MSc, Gynaecology Research Centre, The Royal Women's Hospital, Victoria,  
22 Australia  
23

24 John D Wark PhD, University of Melbourne Department of Medicine and Bone and Mineral  
25 Medicine, Royal Melbourne Hospital, Victoria, Australia  
26

27 **Acknowledgements**  
28

29 This study is supported by an NHMRC Project Grant (APP1048023) and by the Australia and  
30 New Zealand Gynaecological Oncology Group. M Hickey is supported by an NHMRC  
31 Practitioner Fellowship APP1058935. Thanks to clinicians at the recruiting sites: Dr Judy  
32 Kirk, Associate Professor Alison Brand, Dr Lesley Andrews, Associate Professor Trevor  
33 Tejana-Berges, Dr David Wrede.  
34  
35

36 **Funding Statement**  
37

38 This study is supported by an NHMRC Project Grant (APP1048023) and by the Australia and  
39 New Zealand Gynaecological Oncology Group. M Hickey is supported by an NHMRC  
40 Practitioner Fellowship APP1058935.  
41

42 **Correspondence to:**  
43

44 M Hickey

45 hickeym@unimelb.edu.au  
46  
47

48 **Contributors**  
49

50 MH, AT, SB, MAD, EOK and JW contributed to the conception, design, writing and editing  
51 of the protocol. MH drafted the manuscript and all other authors contributed to the final  
52 version. SB wrote the statistical methods. MH is the guarantor. All authors read and approved  
53 the final manuscript.  
54

55 **Competing interests**  
56

57 None.  
58  
59  
60

## Ethics approvals

| Country, State      | HREC Name                                                             | HREC Reference # | Project #        | Approval Date |
|---------------------|-----------------------------------------------------------------------|------------------|------------------|---------------|
| Australia, Victoria | Peter MacCallum Cancer Centre                                         | HREC/12/PMCC/24  | 12/90            | 04/12/2012    |
| Australia, Victoria | The Royal Women's Hospital                                            | HREC/12/PMCC/24  | 12/07            | 20/12/2012    |
| Australia, Victoria | Melbourne Health                                                      | HREC/12/PMCC/24  | 2013/060         | 07/10/2013    |
| Australia, NSW      | South Eastern Sydney Local Health District (Prince of Wales Hospital) | HREC/13/POWH/61  | 12/304           | 23/05/2013    |
| Australia, NSW      | Western Sydney Local Health District                                  | HREC/13/POWH/61  | SSA/13/WMEAD/189 | 28/11/2013    |
| Australia, NSW      | South Eastern Sydney Local Health District (Royal Hospital for Women) | HREC/13/POWH/61  | 14/G/146         | 29/04/2014    |
| Australia, NSW      | Sydney Local Health District (Royal Prince Alfred Hospital)           | X14-0396         | 10/21            | 22/04/2015    |
| Australia, NSW      | Chris O'Brien Lifehouse                                               | X14-0396         | LH15/035         | 10/08/2015    |

**Provenance and peer review. Not commissioned; externally peer reviewed.**

**Data sharing statement:** It is the intention of the study group that once completed and the research articles stemming from the study have been published, any remaining data that is fully anonymised and not sensitive should be made open access.

Word Count: 4421

*Conflict of Interest declaration.* No conflict of interest to declare

**Abstract**

**Introduction:** Women at high inherited risk of ovarian cancer are advised to undergo risk-reducing bilateral salpingo-oophorectomy (RRBSO) at age 40-45 years or when their families are complete. Most women are premenopausal at this age, so RRBSO will induce surgical menopause. Despite the clear benefits of RRBSO for cancer risk reduction, much less is known about the impact on non-cancer outcomes which contribute to health and wellbeing and inform surveillance and management strategies.

**Methods and analysis:** This will be a multicentre, prospective cohort study of 105 premenopausal high-risk women undergoing RRBSO and an age-matched comparison group of 105 premenopausal women not planning oophorectomy or pregnancy in the next two years. The aim of this study is to measure the impact of RRBSO on sexual function (primary outcome) at 12 months in high-risk premenopausal women compared to the comparison group. Secondary outcomes include menopausal symptoms and menopause-related quality of

1  
2  
3 life (QOL), mood, sleep quality, markers of cardiovascular disease and prediabetes, bone  
4 density and markers of bone turnover and the impact of hormone replacement therapy (HRT)  
5 use on these outcomes. Data analysis methods will include logistic and linear regression  
6 using general estimating equations accounting for the repeated outcome measurements within  
7 each participant.  
8

9  
10 Ethics and dissemination: The study has been approved by institutional ethics committees at  
11 each participating centre. Findings will be disseminated through peer reviewed publications  
12 and conference presentations, national and international networks of centres managing high-  
13 risk women and will inform national and international clinical guidelines.  
14

15 Registration details: The trial is registered ([anzctr.org.au](http://anzctr.org.au), Registration No:  
16 ACTRN12615000082505)  
17

## 18 **Introduction**

19  
20 Ovarian cancer is the fifth most common female cancer and carries a poor prognosis. Around  
21 10-15% of ovarian cancers, and over 20% in women under age 50 are due to germline  
22 mutations in the BRCA1 or BRCA2 gene<sup>1</sup>. These women have an elevated lifetime risk of  
23 breast (72% and 69% respectively) and ovarian cancer (44% and 17% respectively)<sup>2</sup>  
24 compared to the population risk of 1-5% for ovarian cancer. Other germline mutations such  
25 the mismatch repair genes responsible for Lynch Syndrome increase ovarian cancer risk to  
26 around 9%<sup>3</sup>. The prevalence of germline gene mutations which increase the risk of ovarian  
27 cancer is up to 1:400 women and these cancers commonly develop at an earlier age than in  
28 the general population<sup>2</sup>. The wider availability of rapid, low-cost sequencing methods and the  
29 increasing indications for gene testing mean that more women are being diagnosed with  
30 germline mutations which increase their risk of ovarian cancer.  
31  
32

33  
34 There is currently no effective screening strategy for ovarian cancer and the only intervention  
35 proven to reduce risk is bilateral salpingo-oophorectomy. Extensive evidence confirms that  
36 RRBSO reduces the risk of ovarian cancer by up to 95% in high-risk women and leads to an  
37 overall survival benefit<sup>4</sup>. RRBSO may also detect occult ovarian cancer. Current guidelines  
38 advise RRBSO before aged 40 in BRCA1 carriers or before aged 45 for BRCA2 carriers<sup>5</sup>.  
39

40  
41 Despite strong evidence that bilateral salpingo-oophorectomy reduces cancer risk and  
42 increases survival in high-risk women, many women decline to undergo risk-reducing  
43 surgery. Reported uptake rates vary considerably from around 17%-89%<sup>6</sup>. The reasons why  
44 many women decline or defer RRBSO are not well understood, but concerns about early  
45 menopause are a factor in premenopausal women<sup>7</sup>. Deleterious gene mutations are commonly  
46 identified in premenopausal women, so RRBSO will lead to surgical menopause. Despite the  
47 clear benefits for cancer risk reduction in high-risk women, very little is known about the  
48 impact of RRBSO on non-cancer outcomes<sup>8</sup> and this is of concern to high-risk women and  
49 their health care providers<sup>9</sup>. In the general population, there is growing evidence that early  
50 menopause (<45 years), and particularly surgical menopause has significant negative  
51 consequences for coronary heart disease<sup>10</sup>, cardiovascular death, all cause-mortality,  
52 dementia and Parkinson's disease, particularly for those who do not take hormone  
53 replacement therapy HRT<sup>11 12</sup>. However, the quality of current evidence is low, and there  
54 have been very few prospective studies of surgical menopause in any population.  
55  
56  
57  
58  
59  
60

1  
2  
3 High-risk women considering RRBSO are faced with complex decision-making, weighing up  
4 the potential adverse health implications of bilateral oophorectomy against the known  
5 reduction in cancer risk<sup>5</sup>. Most studies of RRBSO have focused exclusively on cancer  
6 outcomes, but current evidence suggests that premenopausal women experience a significant  
7 worsening of vasomotor symptoms (hot flushes and night sweats), a persistent decline in  
8 menopause-related quality of life and sexual function one year after RRBSO<sup>13</sup>. HRT partly  
9 mitigates these symptoms, but even in HRT users sexual function and vaginal symptoms do  
10 not return to pre-surgical levels<sup>14 15</sup>. Use of HRT is thought to be safe in high-risk women,  
11 provided they do not have a personal history of breast cancer, but the proportion of users is  
12 unknown and evidence for safety is limited<sup>16</sup>.

14  
15 Bilateral salpingo-oophorectomy leads to infertility, and women may consider undergoing  
16 concurrent hysterectomy. Hysterectomy adds to the duration, cost and potential complications  
17 of surgery, but avoids the need for combined HRT and removes the risk of endometrial  
18 pathology associated with tamoxifen use<sup>17</sup>. More information is needed from prospective  
19 studies to inform women and their health care providers considering hysterectomy at the time  
20 of RRBSO.  
21

22  
23 To support informed decision making and to appropriately structure follow-up care there is  
24 an unmet need for prospective data on the non-cancer consequences of RRBSO<sup>5</sup>. Having  
25 reduced their risks of breast and ovarian cancer, high-risk women should reasonably  
26 anticipate a normal QOL and life expectancy. In order to decide whether and when to  
27 undergo RRBSO, and how best to optimise health post-operatively, more information is  
28 needed about the non-cancer consequences of risk-reducing oophorectomy.  
29

30  
31 This multicentre, population-based, controlled, cohort study will generate new data to inform  
32 decision making around RRBSO and evidence-based follow-up care in the general population  
33 following surgical menopause. The primary objective of WHAM is to assess the association  
34 between RRBSO and sexual function as measured by the Female Sexual Function Index. The  
35 secondary outcomes are menopausal symptoms and menopause-related quality of life, mental  
36 health, bone health and turnover, cardiometabolic risk and sleep quality. We hypothesise that  
37 RRBSO in premenopausal women will reduce sexual function (primary outcome), increase  
38 menopausal symptoms, reduce menopause-related QOL, increase bone turnover, reduce bone  
39 density, increase cardiometabolic risk and reduce sleep quality compared to age-matched  
40 premenopausal women who retain their ovaries. We do not expect RRBSO to affect mental  
41 health<sup>18</sup>.  
42

## 43 44 **Methods: Participants and Outcomes**

### 45 46 **Study design and setting**

47  
48 This is a multicentre, cohort study comparing 105 high-risk pre-menopausal women up to 50  
49 years of age who plan to undergo RRBSO with 105 age-matched, premenopausal women  
50 who do not plan to undergo oophorectomy or pregnancy in the next two years. Study  
51 recruitment commenced in April 2013, enrolling women from 8 public and 4 private hospitals  
52 in Australia (Victoria and New South Wales). The projected timeline for recruitment is 3-4  
53 years. All subjects will be followed up for two years from the baseline visit.  
54

### 55 56 **Eligibility criteria and recruitment**

57  
58  
59  
60

1  
2  
3 Eligible women will be premenopausal and age up to 50 years with regular menstrual periods  
4 (if intact uterus), no vasomotor symptoms and an FSH (follicular stimulating hormone) level  
5 of <15IU/L on day 2-6 of the menstrual cycle. Exclusions include <3 months since pregnancy  
6 and lactation, abnormal uterine bleeding, or use of anti-estrogens such as tamoxifen.  
7

8  
9 Exposed women are defined as those at high inherited risk of ovarian cancer due to  
10 confirmed presence of a gene mutation (carriers of BRCA1, BRCA2, BRIP1, RAD51C,  
11 Lynch Syndrome) or high familial risk of ovarian cancer and planning to undergo RRBSO.  
12 Those with a personal history of breast cancer will be included if they remain premenopausal  
13 and are not currently taking endocrine therapy. Participants will be recruited via clinician  
14 referrals from familial cancer, high-risk breast cancer and menopause clinics, referrals from  
15 public and private gynaecology oncologists and surgeons, and via targeted advertising  
16 through mainstream and electronic media (eg. newspaper and television reports, cancer  
17 registries, cancer support newsletters and websites). Each referral will be processed upon  
18 receipt and eligibility screening and subsequent recruitment will be scheduled to occur within  
19 8 weeks prior to the RRBSO surgery date. The baseline visit will be scheduled for the early  
20 follicular phase (days 2-6) of the subject's menstrual cycle prior to RRBSO.  
21  
22

23 Women in the comparison group are defined as 1:1 individually age-matched (within +/- 5  
24 years), pre-menopausal women who are not planning oophorectomy or pregnancy within the  
25 next 2 years. Comparison subjects can be low-risk or relatives of high-risk women who do  
26 not carry a gene mutation. The comparison group will be recruited via mainstream and  
27 electronic media advertising to the general public (eg. clinical research recruitment websites,  
28 hospital and university staff newsletters and websites), and by asking recruited cases to  
29 recommend the study to relatives and friends. Recruitment will be scheduled to occur during  
30 the early follicular phase (days 2-6) of the subject's menstrual cycle, and within the 8 weeks  
31 after eligibility screening. Women in the comparison group withdrawing prior to the 6-month  
32 follow-up will be replaced women of similar baseline age.  
33  
34

### 35 **Participant timeline**

36  
37 A schedule of study assessments and measurements is presented in Table 1. After informed  
38 consent and eligibility, baseline data will be collected including obstetric, gynaecological,  
39 medical and surgical history, current medications, risk factors for fracture  
40 ([www.shef.ac.uk/FRAX](http://www.shef.ac.uk/FRAX)), risk factors for cardiovascular disease including blood pressure,  
41 circulating cholesterol and lipids and C-reactive protein  
42 ([www.heartfoundation.org.au/SiteCollectionDocuments/austcardiovascular-](http://www.heartfoundation.org.au/SiteCollectionDocuments/austcardiovascular-risk-charts.pdf)  
43 [risk-charts.pdf](http://www.heartfoundation.org.au/SiteCollectionDocuments/austcardiovascular-risk-charts.pdf)), tobacco, drug and alcohol use, methods of contraception, methods of breast  
44 cancer surveillance, germline mutation type and family cancer history. In those with a history  
45 of breast cancer, stage and grade of tumour and treatment history will be recorded. Blood  
46 pressure, weight, height and waist-hip ratio will be measured and repeated at selected follow-  
47 up visits (see Table 1). A blood sample will be taken after an overnight fast to measure sex  
48 steroid concentrations, lipids, and cardiovascular risk factors which will be repeated at 1 and  
49 2 years follow-up. A urine sample will be collected for comparison subjects to exclude  
50 pregnancy (see Table 1). Medications used in the 3 months prior to enrolment and throughout  
51 the 2 year follow-up period will be recorded and includes those related to bone health  
52 (calcium, vitamin D and anti-resorptive agents), depression, anxiety, HRT, non-hormonal  
53 treatments for vasomotor symptoms, contraception and insomnia. Adverse events (changes in  
54 physical and psychological health from baseline) will be monitored over the 2-year follow-up  
55 period. Questionnaires to measure sexual function, menopausal symptoms, menopause-  
56  
57  
58  
59  
60

1  
2  
3 related QOL, sleep quality, depression and anxiety will be administered at baseline and all  
4 post-baseline study visits (see Table 1). All participants will undergo DXA scans within 3  
5 months of RRBSO (baseline) and again at 1 and 2-years post-baseline.  
6

7  
8 Participants will be free to withdraw at any time, either through formal revocation of consent  
9 (patient preference) or via ceased communication with the recruitment site (lost to follow-  
10 up). All collected data will be included in the analyses and any discrepancies related to data  
11 collected prior to withdrawal will be queried with the subject up to one month after the  
12 withdrawal date. In order to minimise missing data, participants who cannot complete all  
13 scheduled visits will be invited to continue in the study despite missing visits. Those who  
14 withdraw at a scheduled time-point, or who are unable to attend the recruitment site at a  
15 scheduled time-point will be offered the opportunity to complete any time-point data that can  
16 be captured remotely via telephone and email correspondence, including questionnaire,  
17 medications and adverse events data.  
18

## 19 20 **Outcomes**

21  
22 The primary outcome is the change in sexual function following RRBSO, as measured by the  
23 Female Sexual Function Index (FSFI)<sup>19</sup>. Sexual function was selected because it is a patient  
24 priority and in young women and because previous prospective studies suggest that sexual  
25 function may be permanently impaired following RRBSO<sup>13-15</sup>. Secondary outcomes include  
26 menopause-related QOL, menopausal symptoms, sleep quality, depression and anxiety,  
27 markers of cardiovascular disease and prediabetes, bone density and markers of bone  
28 turnover. All measures will be collected at baseline (prior to RRBSO in the intervention  
29 group) with follow-up measures scheduled as per Table 1.  
30

## 31 32 **Measurement of sexual function**

33  
34 Subjects will be asked whether they currently have a sexual partner and whether sexual  
35 problems for the partner impact on their sexual activity. We will use standardized and  
36 validated questionnaires to measure three aspects of sexual function:  
37

- 38  
39 1) The Female Sexual Function Index (FSFI) is a widely-used brief self-report  
40 questionnaire that assesses six separate dimension: Desire, arousal, lubrication,  
41 orgasm, satisfaction, pain and it also provides a total score<sup>20</sup>. The FSFI has been  
42 validated in a large group of women with sexual arousal disorder versus age-matched  
43 controls<sup>19</sup> and in cancer survivors<sup>21</sup>. It has demonstrated a high level of acceptability,  
44 reliability and validity in both cancer and non-cancer populations<sup>22</sup>. The FSFI has a  
45 high internal consistency, test retest reliability and differentiates well between  
46 sexually-dysfunctional and non-dysfunctional women and is highly sensitive in  
47 discriminating between clinical and non-clinical populations<sup>20</sup>. FSFI scores (primary)  
48 will indicate which domains of sexual function are affected by RRBSO. The FSFI  
49 takes <5 minutes to complete.  
50
- 51  
52 2) The revised Female Sexual Distress Scale (FSDS-R)<sup>23</sup> is a brief (13 item)  
53 questionnaire which measures the extent to which reduced sexual desire causes  
54 distress in women. Distress is a key feature of hypoactive sexual desire disorder  
55 (HSDD). The (FSDS-R) has good discriminant validity, test-retest reliability, and  
56 internal consistency in measuring sex-related personal distress in women with  
57  
58  
59  
60



1  
2  
3 HSDD<sup>24</sup>. The scale also has good content validity (relevance, clarity,  
4 comprehensiveness)<sup>25</sup>.

5  
6 3) The Sexual Activity Questionnaire (SAQ) evaluates sexual pleasure (desire, enjoyment  
7 and satisfaction), discomfort (vaginal dryness and dyspareunia) and habit (frequency of  
8 sexual activity compared to usual activity)<sup>26</sup>. The SAQ has been validated in breast cancer  
9 patients and in high-risk women<sup>27</sup>. It is quick and easy to administer and has good face  
10 validity discriminating between the sexual functioning of pre- and post-menopausal  
11 women<sup>27</sup>.

### 12 13 14 **Measurement of circulating testosterone and SHBG**

15  
16 Circulating testosterone concentrations are reduced following RRBSO and this may  
17 contribute to sexual function, although findings are conflicting<sup>15</sup>. Circulating concentrations  
18 of total testosterone and the testosterone precursors, androstenedione and 5-  
19 dehydroepiandrosterone (DHEA) and sex hormone binding globulin (SHBG) will be  
20 measured at baseline and follow up, as per Table 1. Fasting blood samples will be  
21 immediately centrifuged to isolate plasma, and stored at -80 degrees centigrade. Because  
22 conventional radioimmunoassays lack sensitivity at low androgen concentrations found after  
23 surgical menopause<sup>82</sup> we will use liquid chromatography tandem mass spectrometry (LC-  
24 MS/MS), using a Sciex API 5500Q instrument by CPR Pharma Services (Adelaide, SA). The  
25 lower limit of measurement is 0.025 ng/mL for testosterone, 0.05 ng/mL for androstenedione,  
26 and 0.5 ng/mL for DHEA. The intra-assay coefficients of variation are low (<5%) at 1nM.  
27 SHBG concentrations will be measured using a non-competitive liquid-phase RIA (68562,  
28 Orion Diagnostica, Finland). We will calculate free testosterone concentrations using  
29 measured total testosterone and SHBG concentrations<sup>28</sup>.

### 30 31 32 33 **Measurement of menopausal symptoms and menopause-related quality of life**

34  
35 Menopausal symptoms will be measured using the Greene Climacteric Scale, which measures  
36 the frequency and severity of menopausal symptoms in psychological somatic and vasomotor  
37 domains<sup>29</sup>. The scale is widely used and has been validated in an Australian population<sup>30</sup>.

38  
39 Menopause-related QOL will be measured using the Menopause-related Quality of Life  
40 Intervention (MENQOL-Intervention) questionnaire<sup>31</sup>. The MENQOL-intervention covers  
41 four domains; vasomotor, physical, psychosocial and sexual, and includes a global QOL life  
42 item. It is widely used internationally and its strength and validity have recently been  
43 confirmed in a large population-based sample of midlife women<sup>32</sup> and in breast cancer  
44 survivors<sup>33</sup>. The questionnaire tests the impact of an intervention, such as oophorectomy, on  
45 symptoms. Each takes less than five minutes to complete. Use of HRT and of non-hormonal  
46 medications for vasomotor symptoms will be recorded, and subjects will be asked about  
47 decision-making around HRT.

### 48 49 50 51 **Measurement of sleep quality**

52  
53 Sleep quality will be measured using the Pittsburgh Sleep Quality Index (PSQI)<sup>34</sup>, a widely  
54 used and validated measure of sleep quality<sup>35</sup>. The questionnaire measures subjective sleep  
55 quality, latency, duration, habitual sleep efficiency, sleep disturbances and medications, and  
56 daytime dysfunction. The PSQI takes <5 minutes to complete.

### Measurements of depression and anxiety

Depression and anxiety will be measured using the Centre for Epidemiologic Studies Depression (CES-D)<sup>36</sup> and the Generalized Anxiety Disorder (GAD-7)<sup>37</sup> scales, respectively. The CES-D measures the frequency of depressive feelings and behaviours experienced in the past week and includes 20 items that are assigned scores ranging from 0-3. The final CES-D score (0 – 60) is the sum of the 20 items and a score of  $\geq 16$  points is indicative of depression. The GAD-7 measures the frequency of GAD symptoms in the past fortnight and includes 7 items that are assigned scores ranging from 0-3. The final GAD-7 score (0 – 21) is the sum of the 7 items and a scores of 5-9, 10-14 and 15-21 are indicative of mild, moderate and severe anxiety respectively. Each questionnaire takes <5 minutes to complete.

### Measurement of cardiovascular disease risk

Resting blood pressure, weight, height and waist/hip ratio will be measured as per table 1. Fasting blood samples will be analysed for serum insulin, glucose, triglycerides (TG), cholesterol, high density lipoprotein (HDL-C), low density lipoprotein (LDL-C) and high sensitivity C-reactive protein (hs CRP) which predicts CVD in healthy women<sup>38</sup>. These have not previously been prospectively measured in surgical menopause. Homeostasis model assessment (HOMA) will be calculated by fasting insulin ( $\mu\text{U/ml}$ ) x fasting glucose (mM)/22.5. Insulin resistance will be defined by a HOMA reading >488. The presence of diabetes or prediabetes will be established by fasting glucose and HbA1c. A HbA1c of >6.5% will be used as a cut-off for the diagnosis of diabetes as recommended by the American Diabetes Association ([www.diabetes.org](http://www.diabetes.org)) and carried out in National Association of Testing Authorities (NATA) accredited laboratories using standard equipment.

### Measurement of bone density and markers of bone turnover

We will measure fasting serum albumin, creatinine, calcium and phosphate, circulating markers of bone turnover (beta-C-terminal telopeptide of type I collagen (beta CTX) and N-terminal propeptide of type 1 collagen)<sup>39</sup>. We will measure 25-OH vitamin D2 and D3 using LC tandem mass spectrometry and intact parathyroid hormone (PTH) immunoassay. The bone turnover markers are independent predictors of fracture risk and will supplement BMD data. Regional BMD (at the lumbar spine and hip) will be measured using dual-energy X-ray absorptiometry (DXA) within 3 months of RRBSO (baseline). We will also use DXA to measure total body bone mineral content (BMC) which will increase power to detect bone loss<sup>40</sup>. DXA measurement location will be included as a covariate and change from baseline will be used in outcome analyses.

### Sample size

We will recruit 105 high-risk pre-menopausal women planning RRBSO and 105 age-matched ( $\pm 5$  years) women in the comparison group. The primary outcome is sexual dysfunction (FSFI score <26.55)<sup>41</sup> where lower FSFI scores indicate worse sexual function. Based on large population-based surveys, we have assumed that around 24% of premenopausal women will have sexual dysfunction (FSFI below clinical cut off) at baseline<sup>42,43</sup> and that the proportion with sexual dysfunction does not differ between the high-risk women or those in the comparison group, or between age groups, and that it does not change over the 2-year study period in the comparison group. Sample size calculations are based on comparing the proportion of women with sexual dysfunction in the RRBSO group with the comparison

1  
2  
3 group at 12 months follow-up. A sample size of 89 women per group will provide 80%  
4 power at a two-sided 5% level of significance to detect a 21% difference (from 24% in the  
5 comparison group to 45% in the RRBSO group), or 105 per group when allowing for 15%  
6 loss to follow-up at 2-years. This difference in the proportion of women with sexual  
7 dysfunction is clinically significant<sup>44</sup>. For the secondary outcomes, this sample size of 89 per  
8 group will also provide 83% power to detect a difference in the proportion of women with a  
9 DXA T-score of  $\leq -1$  at 2 years, from 16% in the comparison group to 36% in the RRBSO  
10 group<sup>45</sup> and 92% power to detect a mean difference between groups of 0.5 standard deviation  
11 in the MENQOL score  
12  
13

## 14 **Methods: Data collection, management, and analysis**

### 15 **Data collection methods**

16  
17  
18 Study data are being collected using paper case report forms (CRF), paper self-reported  
19 questionnaires, paper recorded phone interviews, and paper copies of biochemical, pathology  
20 and bone density imaging reports. These paper documents will be kept by each recruitment  
21 site in a locked cabinet accessible to local research staff only. All data will be entered and  
22 stored in a de-identified, password-protected electronic study database created with the  
23 REDCap<sup>®</sup> web application (<https://projectredcap.org/>)<sup>44</sup>. REDCap (Research Electronic Data  
24 Capture) is a secure, web-based application designed to support data capture for research  
25 studies, providing: 1) an intuitive interface for validated data entry; 2) audit trails for tracking  
26 data manipulation and export procedures; 3) automated export procedures for seamless data  
27 downloads to common statistical packages; and 4) procedures for importing data from  
28 external sources<sup>46</sup>. Internet access to the REDCap<sup>®</sup> database will utilise a secure server  
29 located at the University of Melbourne, Australia (REDCap<sup>®</sup> consortium host), and access  
30 will be limited to local research staff at each recruitment site. Research staff will only have  
31 access to the REDCap<sup>®</sup> data collected at their local recruitment site, whereas the chief  
32 investigator, project manager, data administrator and statistician will have access to all  
33 REDCap<sup>®</sup> data.  
34  
35  
36

### 37 **Data management**

38  
39 Management of comprehensive and valid paper records will be the responsibility of local  
40 research staff at each recruitment site. To ensure a systematic approach to data collection the  
41 project manager will provide protocol training and written standard operating procedures to  
42 research staff prior to any study visits being performed. Data integrity will be maintained  
43 thorough review of all collected data prior to, during and after each study visit. Any time-  
44 sensitive data (eg. questionnaires) will be reviewed as soon as they are collected and any  
45 identified discrepancies will be resolved within one week of collection. Medications and  
46 adverse events data will be reviewed and consolidated at every study visit. All other data  
47 discrepancies will be queried with the subject via email or telephone correspondence and  
48 resolved within one month of collection. Records of participant screenings and enrolments at  
49 each site will be maintained using Microsoft Excel spreadsheets with diary features. These  
50 documents will assist research staff to adhere to study timelines and to regularly monitor and  
51 report site study progress to the project manager, investigators and the responsible HRECs.  
52 Electronic data entry into the REDCap<sup>®</sup> database will begin no later than 12 months prior to  
53 the last participant last visit. Database training of research staff and data entry will be  
54 conducted and overseen (respectively) by the project manager.  
55  
56  
57  
58  
59  
60

### Data and safety monitoring

We do not anticipate any study-related adverse events (AEs) or serious adverse events (SAEs). The only anticipated AEs include phlebotomy-related site injuries (minor) and vasovagal syncope (rarely), and negative psychological responses to questionnaires and interview discussions. These AEs will be circumvented or managed by providing the subject with appropriate advice and counselling during and after each study visit. Reports of biochemistry, pathology and bone density results will be routinely reviewed by medically-qualified site investigators. Any concerning results will be immediately reviewed and reported to the subject and her GP. All other results will be reviewed within one week of report receipt and any results outside of normal ranges will be reported to the subject's GP within 2 weeks. The project manager will directly monitor all Victorian data within one month of collection, and personally visit other recruitment sites on a 6-monthly basis to perform data monitoring activities. The outcomes will be reported to the chief investigator and all relevant research staff and investigators within one month of each monitoring visit, and any systematic problems with data collection, data management and adverse events monitoring and reporting will be rectified. Questionnaires will be independently scored on two separate occasions prior to data entry into the REDCap<sup>®</sup> database, and all data entry into REDCap<sup>®</sup> will be monitored by an independent data administrator. REDCap<sup>®</sup> data queries will be addressed by the project manager and data administrator using the REDCap<sup>®</sup> Data Resolution Workflow module.

### Statistical methods

The analysis set will consist of all recruited women. Baseline characteristics will be summarised by group. The primary outcome is sexual dysfunction, defined as an FSFI score of  $<26.55$  at 12 months. Changes in FSFI from baseline will also be measured as a continuous variable. Binary secondary outcomes (e.g., PSQI score  $> 5$ ; CES-D score  $\geq 16$ ; GAD-7  $\geq 10$ , absolute change from baseline in diastolic blood pressure  $\geq 5$  mmHg, relative change from baseline in HDL:LDL ratio  $> 2.5$ , BMD T-score  $\leq -1$ ) will be analysed by fitting a generalised linear model with a logistic link function using generalised estimation equations to account for the repeated measurements<sup>47</sup>. Continuous secondary outcomes will be analysed by fitting a linear regression model using generalised estimating equations. Appropriate transformation of a continuous variable may be performed before analyses if the variable is found to be skewed. A directed acyclic graph will be used to explore which covariates to include in the adjusted -model<sup>48,49</sup>. An adjusted model will be fitted to correct for the potential confounding of time-independent covariates (e.g., age at baseline, use of hormonal contraception at baseline, use of antidepressant medication at baseline) and time-dependent covariates (e.g., use of HRT, symptoms of depression and/or anxiety). We anticipate that around 30% will undergo hysterectomy at the time of RRBSO, and 50% will subsequently take HRT. The proportion of women who take HRT/tibolone during the 24-month follow-up period will be compared using logistic regression. The number and proportion of women using specific medication (e.g., HRT, antidepressants) will be summarised by group. Adverse events will be recorded and graded using the revised National Cancer Institute Common Terminology Criteria for Adverse Events (CTCAE) criteria and the number and proportion of women with at least one AE will be summarised by group. Exploratory subgroup analyses will examine whether the effect differs across the following subgroup categories a) age at

1  
2  
3 baseline (<45 years vs  $\geq$ 45 years) and b) use of hormonal contraception at baseline (yes vs  
4 no) by adding the subgroup and its interaction with group to the model.  
5

### 6 7 **Outcomes and Significance**

8  
9 Growing numbers of women are known to be at high inherited risk of ovarian cancer and are  
10 electing to undergo RRBSO. The established reduction in ovarian cancer mortality following  
11 RRBSO could be further improved by minimizing the negative non-cancer consequences,  
12 which also may contribute to morbidity and all-cause mortality. This can be addressed only  
13 when the non-cancer outcomes are known, and this requires prospective data collection. The  
14 principal significance is high burden of disease from ovarian cancer and the growing number  
15 of high-risk women who would benefit from RRBSO. In addition, because prospective  
16 studies of surgical menopause in the general population are very limited, the findings from  
17 this study will also inform care of low-risk women undergoing surgical menopause. These  
18 data will be used to develop resources to support decision making around RRBSO including  
19 the timing of surgery, additional hysterectomy, preoperative risk assessment and counselling  
20 and post-operative follow-up including use of HRT. Our studies will directly improve cancer  
21 outcomes by impact on clinical practice and policy, through the development of  
22 multidisciplinary evidence-based guidelines and screening protocols. Consumers have clearly  
23 indicated that they wish to be informed about the consequences of RRBSO and that current  
24 information provision and follow-up care are inadequate<sup>50 51</sup>. Decision making and  
25 satisfaction are improved when high-risk women are offered dedicated clinical services<sup>52 53</sup>.  
26 Our data and guidelines will provide a template for the care of other high-risk women  
27 considering RRBSO as new genes are identified. Improved information about the non-cancer  
28 consequences of RRBSO is unlikely to dissuade high-risk women from surgery. Despite side  
29 effects, most do not regret their choice<sup>18 50</sup>. Improved follow-up care may also improve QOL  
30 for high-risk women and contribute to early detection and/or prevention of conditions related  
31 to early menopause. This will be the first international multicentre, prospective study of non-  
32 cancer outcomes after RRBSO or surgical menopause in any population. Currently, there is  
33 no consensus on how high-risk women should be managed following RRBSO. This study  
34 will provide new evidence on which to develop evidence-based care for this growing  
35 population of women.  
36  
37  
38

### 39 **Ethics and Dissemination**

40  
41 This is a prospective observational cohort study of high-risk women undergoing RRBSO. No  
42 study-related safety concerns are anticipated. The study has been granted ethics approval at  
43 each of the participating recruitment centres, including:  
44

- 45
- 46 • Peter MacCallum Cancer Centre (Victoria, Australia)
- 47 • The Royal Women's Hospital (Victoria, Australia)
- 48 • The Royal Melbourne Hospital (Victoria, Australia)
- 49 • Prince of Wales Hospital (NSW, Australia)
- 50 • Westmead Hospital (NSW, Australia)
- 51 • Royal Hospital for Women (NSW, Australia)
- 52 • Royal Prince Alfred Hospital (NSW, Australia)
- 53 • Chris O'Brien Lifehouse (NSW, Australia)
- 54
- 55
- 56
- 57
- 58
- 59
- 60

1  
2  
3 Dissemination will be through peer-reviewed publications, presentations at national and  
4 international conferences and existing networks including WISP, National and International  
5 Menopause societies and specialist colleges.  
6  
7  
8  
9  
10  
11  
12  
13  
14  
15  
16  
17  
18  
19  
20  
21  
22  
23  
24  
25  
26  
27  
28  
29  
30  
31  
32  
33  
34  
35  
36  
37  
38  
39  
40  
41  
42  
43  
44  
45  
46  
47  
48  
49  
50  
51  
52  
53  
54  
55  
56  
57  
58  
59  
60

Table 1: Schedule of Assessments / Investigations

| Study Procedures                                                                                                   | Baseline Day 1* (Visit 1) | Month 3 ±6 weeks (Visit 2) | Month 6 ±6 weeks (No Visit) | Month 12 ±6 weeks (Visit 3) | Month 24 ±6 weeks (Visit 4) |
|--------------------------------------------------------------------------------------------------------------------|---------------------------|----------------------------|-----------------------------|-----------------------------|-----------------------------|
| Informed Consent and Eligibility                                                                                   | •                         |                            |                             |                             |                             |
| Surgical, Medical, Gynaecological, Obstetric and Menstrual History                                                 | •                         |                            |                             |                             |                             |
| Smoking, Drug and Alcohol Use History                                                                              | •                         |                            |                             |                             |                             |
| Germline Mutation Testing History                                                                                  | •                         |                            |                             |                             |                             |
| Personal and Family Cancer History                                                                                 | •                         |                            |                             |                             |                             |
| Personal Breast Cancer Surveillance, Diagnosis, Treatment Details (if applicable)                                  | •                         |                            |                             |                             |                             |
| Contraceptive Methods                                                                                              | •                         |                            |                             |                             |                             |
| Fracture Risk Assessment ( <a href="http://www.shef.ac.uk/FRAX/tool.jsp">http://www.shef.ac.uk/FRAX/tool.jsp</a> ) | •                         |                            |                             |                             |                             |
| Height                                                                                                             | •                         |                            |                             |                             |                             |
| Weight                                                                                                             | •                         |                            |                             | •                           | •                           |
| Waist-Hip Ratio ( <a href="http://bupa.com.au/">http://bupa.com.au/</a> )                                          | •                         |                            |                             | •                           | •                           |
| Blood Pressure                                                                                                     | •                         | •                          |                             | •                           | •                           |
| Urinary Pregnancy Test (Comparison)                                                                                | •                         | •                          |                             | •                           | •                           |
| Medications                                                                                                        | •                         | •                          | •                           | •                           | •                           |
| Adverse Events                                                                                                     |                           | •                          | •                           | •                           | •                           |
| <b>Questionnaires</b>                                                                                              |                           |                            |                             |                             |                             |
| FSFI, FSDS-R and SAQ (Sexual function, distress and activity)                                                      | •                         | •                          | •                           | •                           | •                           |
| GCS and MENQOL (Menopausal Symptoms and OOL)                                                                       | •                         | •                          | •                           | •                           | •                           |
| PSQI (Sleep Quality)                                                                                               | •                         | •                          | •                           | •                           | •                           |
| CES-D (Depression) and GAD-7 (Anxiety)                                                                             | •                         | •                          | •                           | •                           | •                           |
| <b>Blood Tests (Fasting)</b>                                                                                       |                           |                            |                             |                             |                             |
| FSH, Estradiol (days 2-6 menstrual cycle)                                                                          | •                         |                            |                             |                             |                             |
| Total Testosterone, DHEAS, Androstenedione, SHBG                                                                   | •                         |                            |                             | •                           | •                           |
| Total Cholesterol, LDL-C, HDL-C, Triglycerides, Insulin, Glucose, HbA1c                                            | •                         |                            |                             | •                           | •                           |
| Albumin, Creatinine, Calcium, Phosphate, P1NP, BCTX, Parathyroid Hormone                                           | •                         |                            |                             | •                           | •                           |
| <b>Bone Mineral Density (BMD)</b>                                                                                  |                           |                            |                             |                             |                             |
| Baseline DXA Scans of Hip and Lumbar Spine BMD and of Total Body Bone                                              |                           | •                          |                             | •                           | •                           |

\* The baseline visit will be performed up to 8 weeks prior to RRBSO for the intervention group, or following eligibility screening for controls.

## References

1. Alsop K, Fereday S, Meldrum C, et al. BRCA mutation frequency and patterns of treatment response in BRCA mutation-positive women with ovarian cancer: a report from the Australian Ovarian Cancer Study Group. *Journal of clinical oncology : official journal of the American Society of Clinical Oncology* 2012;30(21):2654-63. doi: 10.1200/jco.2011.39.8545 [published Online First: 2012/06/20]
2. Kuchenbaecker KB, Hopper JL, Barnes DR, et al. Risks of Breast, Ovarian, and Contralateral Breast Cancer for BRCA1 and BRCA2 Mutation Carriers. *Jama* 2017;317(23):2402-16. doi: 10.1001/jama.2017.7112 [published Online First: 2017/06/21]
3. Bonadona V, Bonaïti B, Olschwang S, Grandjouan S, Huiart L, Longy M, Guimbaud R, Buecher B, Bignon Y.J., Caron O, Colas C, Noguès C, Lejeune-Dumoulin S, Olivier-Faivre L, Polycarpe-Osaer F, Nguyen T.D., Desseigne F, Saurin J.C., Berthet P, Leroux D, Duffour J, Manouvrier S, Frébourg T, Sobol H, Lasset C, Bonaïti-Pellié C; French Cancer Genetics Network. Cancer risks associated with germline mutations in MLH1, MSH2, and MSH6 genes in Lynch syndrome. *Jama* 2011;305(22):2304-10.
4. Marchetti C, De Felice F, Palaia I, et al. Risk-reducing salpingo-oophorectomy: a meta-analysis on impact on ovarian cancer risk and all cause mortality in BRCA 1 and BRCA 2 mutation carriers. *BMC women's health* 2014;14:150. doi: 10.1186/s12905-014-0150-5 [published Online First: 2014/12/17]
5. Hartmann LC, Lindor NM. The Role of Risk-Reducing Surgery in Hereditary Breast and Ovarian Cancer. *The New England journal of medicine* 2016;374(5):454-68. doi: 10.1056/NEJMra1503523 [published Online First: 2016/02/04]
6. Sidon L, Ingham S, Clancy T, Clayton R, Clarke A, Jones E.A., Lalloo F, Evans D.G. Uptake of risk-reducing salpingo-oophorectomy in women carrying a BRCA1 or BRCA2 mutation: evidence for lower uptake in women affected by breast cancer and older women. *Br J Cancer* 2012;106(4):775-9.
7. Mai PL, Piedmonte M, Han PK, et al. Factors associated with deciding between risk-reducing salpingo-oophorectomy and ovarian cancer screening among high-risk women enrolled in GOG-0199: An NRG Oncology/Gynecologic Oncology Group study. *Gynecologic oncology* 2017;145(1):122-29. doi: 10.1016/j.ygyno.2017.02.008 [published Online First: 2017/02/14]
8. Cohen JV, Chiel L, Boghossian L, et al. Non-cancer endpoints in BRCA1/2 carriers after risk-reducing salpingo-oophorectomy. *Familial cancer* 2012;11(1):69-75. doi: 10.1007/s10689-011-9480-8 [published Online First: 2011/09/08]
9. Miller SM, Roussi P, Daly MB, et al. New strategies in ovarian cancer: uptake and experience of women at high risk of ovarian cancer who are considering risk-reducing salpingo-oophorectomy. *Clin Cancer Res* 2010;16(21):5094-106.
10. Mytton J, Evison F, Chilton PJ, et al. Removal of all ovarian tissue versus conserving ovarian tissue at time of hysterectomy in premenopausal patients with benign disease: study using routine data and data linkage. *BMJ (Clinical research ed)* 2017;356:j372. doi: 10.1136/bmj.j372 [published Online First: 2017/02/09]
11. Rocca WA, Gazzuola-Rocca L, Smith CY, et al. Accelerated Accumulation of Multimorbidity After Bilateral Oophorectomy: A Population-Based Cohort Study. *Mayo Clinic proceedings* 2016;91(11):1577-89. doi: 10.1016/j.mayocp.2016.08.002 [published Online First: 2016/10/04]
12. Evans EC, Matteson KA, Orejuela FJ, et al. Salpingo-oophorectomy at the Time of Benign Hysterectomy: A Systematic Review. *Obstetrics and gynecology* 2016;128(3):476-85. doi: 10.1097/aog.0000000000001592 [published Online First: 2016/08/09]
13. Finch A, Metcalfe KA, Chiang JK, et al. The impact of prophylactic salpingo-oophorectomy on menopausal symptoms and sexual function in women who carry a BRCA mutation. *Gynecologic oncology* 2011;121(1):163-8. doi: 10.1016/j.ygyno.2010.12.326 [published Online First: 2011/01/11]



- 1  
2  
3 14. Johansen N, Liavaag AH, Tanbo TG, et al. Sexual activity and functioning after risk-reducing  
4 salpingo-oophorectomy: Impact of hormone replacement therapy. *Gynecologic oncology*  
5 2016;140(1):101-6. doi: 10.1016/j.ygyno.2015.11.016 [published Online First: 2015/11/26]  
6  
7 15. Tucker PE, Bulsara MK, Salfinger SG, et al. Prevalence of sexual dysfunction after risk-reducing  
8 salpingo-oophorectomy. *Gynecologic oncology* 2016;140(1):95-100. doi:  
9 10.1016/j.ygyno.2015.11.002 [published Online First: 2015/11/08]  
10  
11 16. Domchek S, Kaunitz AM. Use of systemic hormone therapy in BRCA mutation carriers.  
12 *Menopause (New York, NY)* 2016;23(9):1026-7. doi: 10.1097/gme.0000000000000724  
13 [published Online First: 2016/08/10]  
14  
15 17. Shu CA, Pike MC, Jotwani AR, et al. Uterine Cancer After Risk-Reducing Salpingo-oophorectomy  
16 Without Hysterectomy in Women With BRCA Mutations. *JAMA oncology* 2016;2(11):1434-  
17 40. doi: 10.1001/jamaoncol.2016.1820 [published Online First: 2016/07/02]  
18  
19 18. Finch A, Metcalfe KA, Chiang J, et al. The impact of prophylactic salpingo-oophorectomy on  
20 quality of life and psychological distress in women with a BRCA mutation. *Psycho-oncology*  
21 2013;22(1):212-9. doi: 10.1002/pon.2041 [published Online First: 2011/09/14]  
22  
23 19. Rosen R, Brown C, Heiman J, et al. The Female Sexual Function Index (FSFI): a multidimensional  
24 self-report instrument for the assessment of female sexual function. *Journal of sex & marital*  
25 *therapy* 2000;26(2):191-208. [published Online First: 2000/04/27]  
26  
27 20. Meston C, M., Derogatis, L.R. Validated instruments for assessing female sexual dysfunction. *J*  
28 *Sex Mar Ther* 2002;28s:155-64.  
29  
30 21. Baser RE, Li, Y., Carter, J. Psychometric validation of the Female Sexual Function Index (FSFI) in  
31 cancer survivors. *Cancer* 2012;10.1002/cncr.26739. [Epub ahead of print]  
32  
33 22. Bartula I, Sherman KA. The Female Sexual Functioning Index (FSFI): evaluation of acceptability,  
34 reliability, and validity in women with breast cancer. *Supportive care in cancer : official*  
35 *journal of the Multinational Association of Supportive Care in Cancer* 2015;23(9):2633-41.  
36 doi: 10.1007/s00520-015-2623-y [published Online First: 2015/02/12]  
37  
38 23. Derogatis LR, Rosen R, Leiblum S, et al. The Female Sexual Distress Scale (FSDS): initial validation  
39 of a standardized scale for assessment of sexually related personal distress in women.  
40 *Journal of sex & marital therapy* 2002;28(4):317-30. [published Online First: 2002/06/27]  
41  
42 24. Derogatis L, Clayton, A., Lewis-D'Agostino, D., Wunderlich, G., Fu, Y. Validation of the female  
43 sexual distress scale-revised for assessing distress in women with hypoactive sexual desire  
44 disorder.  
45 *J Sex Med* 2008;5(2):357-64.  
46  
47 25. DeRogatis L, Pyke, R., McCormack, J., Hunter, A., Harding, G. Does the Female Sexual Distress  
48 Scale-Revised cover the feelings of women with HSDD? *J Sex Med* 2011;8(10):2810-5.  
49  
50 26. Thirlaway K, Fallowfield, L., Cuzick, J. The Sexual Activity Questionnaire: a measure of women's  
51 sexual functioning. *Qual Life Res* 1996;5(1):81-90.  
52  
53 27. Atkins L, Fallowfield, L.J. Fallowfield's Sexual Activity Questionnaire in women with without and  
54 at risk of cancer. *Menopause Int* 2007;13(3):103-9.  
55  
56 28. Vermeulen A, Verdonck L, Kaufman JM. A critical evaluation of simple methods for the  
57 estimation of free testosterone in serum. *The Journal of clinical endocrinology and*  
58 *metabolism* 1999;84(10):3666-72. [published Online First: 1999/10/16]  
59  
60 29. Greene J. Constructing a standard climacteric scale. *Maturitas* 1998;29:25-31.  
30. Travers C, O'Neill SM, King R, et al. Greene Climacteric Scale: norms in an Australian population  
in relation to age and menopausal status. *Climacteric : the journal of the International*  
*Menopause Society* 2005;8(1):56-62. doi: RG4214038686512N [pii]  
10.1080/13697130400013443 [published Online First: 2005/04/05]  
31. Lewis JE, Hilditch, J.R., Wong, C.J. Further psychometric property development of the  
Menopause-Specific Quality of Life questionnaire and development of a modified version,  
MENQOL-Intervention questionnaire. *Maturitas* 2005;50(3):209-21.

- 1  
2  
3 32. Van Dole KB, Devellis, R.F., Brown, R.D., Jonsson Funk, M.L., Gaynes, B.N., Williams, R.E.  
4 Evaluation of the Menopause-Specific Quality of Life Questionnaire: a factor-analytic  
5 approach. *Menopause (New York, NY)* 2012;19(2):211-5.  
6  
7 33. Radtke JV, Terhorst, L., Cohen, S.M. The Menopause-Specific Quality of Life Questionnaire:  
8 psychometric evaluation among breast cancer survivors. *Menopause (New York, NY)*  
9 2011;18(3):289-95.  
10  
11 34. Buysse DJ RCr, Monk TH, Berman SR, Kupfer DJ. The Pittsburgh Sleep Quality Index: a new  
12 instrument for psychiatric practice and research. *Psychiatry Res* 1989;28(2):193-213.  
13  
14 35. Backhaus J, Junghanns, K., Broocks, A., Riemann, D., Hohagen, F. Test-retest reliability and  
15 validity of the Pittsburgh Sleep Quality Index in primary insomnia. *J Psychosom Res*  
16 2002;53(3):737-40.  
17  
18 36. Myers JK, Weissman MM. Use of a self-report symptom scale to detect depression in a  
19 community sample. *The American journal of psychiatry* 1980;137(9):1081-4. doi:  
20 10.1176/ajp.137.9.1081 [published Online First: 1980/09/01]  
21  
22 37. Spitzer R, . L; Kroenke, K., Williams, J.B.W, Bernd Löwe, D.S.W A Brief Measure for Assessing  
23 Generalized Anxiety Disorder. *Arch Intern Med* 1996;166(10):1092-97. .  
24  
25 38. Buckley DI, Fu R, Freeman M, et al. C-reactive protein as a risk factor for coronary heart disease:  
26 a systematic review and meta-analyses for the U.S. Preventive Services Task Force. *Annals of*  
27 *internal medicine* 2009;151(7):483-95. [published Online First: 2009/10/07]  
28  
29 39. Seibel MJ. Biochemical markers of bone turnover part II: clinical applications in the management  
30 of osteoporosis. *Clin Biochem Rev* 2006;27(3):123-38.  
31  
32 40. MacLinnis RJ, Cassar, C., Nowson, C.A., Paton, L.M., Flicker, L., Hopper, J.L., Larkins, R.G., Wark,  
33 J.D. Determinants of bone density in 30- to 65-year-old women: a co-twin study. *J Bone*  
34 *Miner Res* 2003;18(9):1650-6.  
35  
36 41. Wiegel M, Meston C, Rosen R. The female sexual function index (FSFI): cross-validation and  
37 development of clinical cutoff scores. *Journal of sex & marital therapy* 2005;31(1):1-20. doi:  
38 10.1080/00926230590475206 [published Online First: 2005/04/22]  
39  
40 42. West SL, D'Aloisio AA, Agans RP, et al. Prevalence of low sexual desire and hypoactive sexual  
41 desire disorder in a nationally representative sample of US women. *Archives of internal*  
42 *medicine* 2008;168(13):1441-9. doi: 10.1001/archinte.168.13.1441 [published Online First:  
43 2008/07/16]  
44  
45 43. Lammerink EAG, de Bock GH, Pascal A, et al. A Survey of Female Sexual Functioning in the  
46 General Dutch Population. *The journal of sexual medicine* 2017;14(7):937-49. doi:  
47 10.1016/j.jsxm.2017.04.676 [published Online First: 2017/07/05]  
48  
49 44. Leiblum SR, Koochaki, P.E., Rodenberg, C.A., Barton, I.P., Rosen, R.C. Hypoactive sexual desire  
50 disorder in postmenopausal women: US results from the Women's International Study of  
51 Health and Sexuality (WISHeS). *Menopause* 2006;13(1):46-56.  
52  
53 45. Challberg J, Ashcroft L, Lalloo F, et al. Menopausal symptoms and bone health in women  
54 undertaking risk reducing bilateral salpingo-oophorectomy: significant bone health issues in  
55 those not taking HRT. *British journal of cancer* 2011;105(1):22-7. doi: 10.1038/bjc.2011.202  
56 [published Online First: 2011/06/10]  
57  
58 46. Harris PA, Taylor R, Thielke R, et al. Research electronic data capture (REDCap)--a metadata-  
59 driven methodology and workflow process for providing translational research informatics  
60 support. *Journal of biomedical informatics* 2009;42(2):377-81. doi: 10.1016/j.jbi.2008.08.010  
[published Online First: 2008/10/22]  
47. Zeger SL, Liang KY, Albert PS. Models for longitudinal data: a generalized estimating equation  
approach. *Biometrics* 1988;44(4):1049-60. [published Online First: 1988/12/01]  
48. Shrier I, Platt RW. Reducing bias through directed acyclic graphs. *BMC medical research*  
*methodology* 2008;8:70. doi: 10.1186/1471-2288-8-70 [published Online First: 2008/11/01]

- 1  
2  
3 49. Hernan MA, Hernandez-Diaz S, Werler MM, et al. Causal knowledge as a prerequisite for  
4 confounding evaluation: an application to birth defects epidemiology. *American journal of*  
5 *epidemiology* 2002;155(2):176-84. [published Online First: 2002/01/16]  
6  
7 50. Campfield Bonadies D, Moyer, A., Matloff, E.T. What I wish I'd known before surgery: BRCA  
8 carriers' perspectives after bilateral salpingo-oophorectomy. *Familial cancer* 2010;10(1):79-  
9 85.  
10 51. Hallowell N, Mackay, J., Richards, M., Gore, M., Jacobs, I. High-risk premenopausal women's  
11 experiences of undergoing prophylactic oophorectomy: a descriptive study. *Genet Test*  
12 2004;8(2):148-56.  
13 52. Firth C, Jacobs, C., Evison, M., Pichert, G., Izatt, L., Hunter, M.S. Novel one-stop multidisciplinary  
14 follow-up clinic for BRCA1/2 carriers: patient satisfaction and decision making. *Psycho-*  
15 *oncology* 2011;20(12):1301-8.  
16 53. Harmsen MG, Arts-de Jong M, Horstik K, et al. Very high uptake of risk-reducing salpingo-  
17 oophorectomy in BRCA1/2 mutation carriers: A single-center experience. *Gynecologic*  
18 *oncology* 2016;143(1):113-9. doi: 10.1016/j.ygyno.2016.07.104 [published Online First:  
19 2016/07/20]  
20  
21  
22  
23  
24  
25  
26  
27  
28  
29  
30  
31  
32  
33  
34  
35  
36  
37  
38  
39  
40  
41  
42  
43  
44  
45  
46  
47  
48  
49  
50  
51  
52  
53  
54  
55  
56  
57  
58  
59  
60

## STROBE Statement—checklist of items that should be included in reports of observational studies

|                              | Item No | Recommendation                                                                                                                                                                                                                                                                                                                                                                                                                                                         | Page No |
|------------------------------|---------|------------------------------------------------------------------------------------------------------------------------------------------------------------------------------------------------------------------------------------------------------------------------------------------------------------------------------------------------------------------------------------------------------------------------------------------------------------------------|---------|
| <b>Title and abstract</b>    | 1       | (a) Indicate the study's design with a commonly used term in the title or the abstract                                                                                                                                                                                                                                                                                                                                                                                 | 1       |
|                              |         | (b) Provide in the abstract an informative and balanced summary of what was done and what was found                                                                                                                                                                                                                                                                                                                                                                    | 2       |
| <b>Introduction</b>          |         |                                                                                                                                                                                                                                                                                                                                                                                                                                                                        |         |
| Background/rationale         | 2       | Explain the scientific background and rationale for the investigation being reported                                                                                                                                                                                                                                                                                                                                                                                   | 3       |
| Objectives                   | 3       | State specific objectives, including any prespecified hypotheses                                                                                                                                                                                                                                                                                                                                                                                                       | 4       |
| <b>Methods</b>               |         |                                                                                                                                                                                                                                                                                                                                                                                                                                                                        |         |
| Study design                 | 4       | Present key elements of study design early in the paper                                                                                                                                                                                                                                                                                                                                                                                                                | 4       |
| Setting                      | 5       | Describe the setting, locations, and relevant dates, including periods of recruitment, exposure, follow-up, and data collection                                                                                                                                                                                                                                                                                                                                        | 4       |
| Participants                 | 6       | (a) <i>Cohort study</i> —Give the eligibility criteria, and the sources and methods of selection of participants. Describe methods of follow-up<br><i>Case-control study</i> —Give the eligibility criteria, and the sources and methods of case ascertainment and control selection. Give the rationale for the choice of cases and controls<br><i>Cross-sectional study</i> —Give the eligibility criteria, and the sources and methods of selection of participants | 4-5     |
|                              |         | (b) <i>Cohort study</i> —For matched studies, give matching criteria and number of exposed and unexposed<br><i>Case-control study</i> —For matched studies, give matching criteria and the number of controls per case                                                                                                                                                                                                                                                 | 5       |
| Variables                    | 7       | Clearly define all outcomes, exposures, predictors, potential confounders, and effect modifiers. Give diagnostic criteria, if applicable                                                                                                                                                                                                                                                                                                                               | 6       |
| Data sources/<br>measurement | 8*      | For each variable of interest, give sources of data and details of methods of assessment (measurement). Describe comparability of assessment methods if there is more than one group                                                                                                                                                                                                                                                                                   | 6-8     |
| Bias                         | 9       | Describe any efforts to address potential sources of bias                                                                                                                                                                                                                                                                                                                                                                                                              | 8       |
| Study size                   | 10      | Explain how the study size was arrived at                                                                                                                                                                                                                                                                                                                                                                                                                              | 8       |
| Quantitative<br>variables    | 11      | Explain how quantitative variables were handled in the analyses. If applicable, describe which groupings were chosen and why                                                                                                                                                                                                                                                                                                                                           | 9       |
| Statistical methods          | 12      | (a) Describe all statistical methods, including those used to control for confounding                                                                                                                                                                                                                                                                                                                                                                                  | 10      |
|                              |         | (b) Describe any methods used to examine subgroups and interactions                                                                                                                                                                                                                                                                                                                                                                                                    | 10      |
|                              |         | (c) Explain how missing data were addressed                                                                                                                                                                                                                                                                                                                                                                                                                            | 10      |
|                              |         | (d) <i>Cohort study</i> —If applicable, explain how loss to follow-up was addressed<br><i>Case-control study</i> —If applicable, explain how matching of cases and controls was addressed<br><i>Cross-sectional study</i> —If applicable, describe analytical methods taking account of sampling strategy                                                                                                                                                              | 10      |
|                              |         | (e) Describe any sensitivity analyses                                                                                                                                                                                                                                                                                                                                                                                                                                  | 10      |

Continued on next page

**Results Checklist not applicable – this is a Study Protocol submission****Results**

|                  |     |                                                                                                                                                                                                                                                                                                                                                                                                               |
|------------------|-----|---------------------------------------------------------------------------------------------------------------------------------------------------------------------------------------------------------------------------------------------------------------------------------------------------------------------------------------------------------------------------------------------------------------|
| Participants     | 13* | (a) Report numbers of individuals at each stage of study—eg numbers potentially eligible, examined for eligibility, confirmed eligible, included in the study, completing follow-up, and analysed<br>(b) Give reasons for non-participation at each stage<br>(c) Consider use of a flow diagram                                                                                                               |
| Descriptive data | 14* | (a) Give characteristics of study participants (eg demographic, clinical, social) and information on exposures and potential confounders<br>(b) Indicate number of participants with missing data for each variable of interest<br>(c) <i>Cohort study</i> —Summarise follow-up time (eg, average and total amount)                                                                                           |
| Outcome data     | 15* | <i>Cohort study</i> —Report numbers of outcome events or summary measures over time<br><i>Case-control study</i> —Report numbers in each exposure category, or summary measures of exposure<br><i>Cross-sectional study</i> —Report numbers of outcome events or summary measures                                                                                                                             |
| Main results     | 16  | (a) Give unadjusted estimates and, if applicable, confounder-adjusted estimates and their precision (eg, 95% confidence interval). Make clear which confounders were adjusted for and why they were included<br>(b) Report category boundaries when continuous variables were categorized<br>(c) If relevant, consider translating estimates of relative risk into absolute risk for a meaningful time period |
| Other analyses   | 17  | Report other analyses done—eg analyses of subgroups and interactions, and sensitivity analyses                                                                                                                                                                                                                                                                                                                |

**Discussion**

|                  |    |                                                                                                                                                                            |
|------------------|----|----------------------------------------------------------------------------------------------------------------------------------------------------------------------------|
| Key results      | 18 | Summarise key results with reference to study objectives                                                                                                                   |
| Limitations      | 19 | Discuss limitations of the study, taking into account sources of potential bias or imprecision. Discuss both direction and magnitude of any potential bias                 |
| Interpretation   | 20 | Give a cautious overall interpretation of results considering objectives, limitations, multiplicity of analyses, results from similar studies, and other relevant evidence |
| Generalisability | 21 | Discuss the generalisability (external validity) of the study results                                                                                                      |

**Other information**

|         |    |                                                                                                                                                               |
|---------|----|---------------------------------------------------------------------------------------------------------------------------------------------------------------|
| Funding | 22 | Give the source of funding and the role of the funders for the present study and, if applicable, for the original study on which the present article is based |
|---------|----|---------------------------------------------------------------------------------------------------------------------------------------------------------------|

\*Give information separately for cases and controls in case-control studies and, if applicable, for exposed and unexposed groups in cohort and cross-sectional studies.

**Note:** An Explanation and Elaboration article discusses each checklist item and gives methodological background and published examples of transparent reporting. The STROBE checklist is best used in conjunction with this article (freely available on the Web sites of PLoS Medicine at <http://www.plosmedicine.org/>, Annals of Internal Medicine at <http://www.annals.org/>, and Epidemiology at <http://www.epidem.com/>). Information on the STROBE Initiative is available at [www.strobe-statement.org](http://www.strobe-statement.org).

# BMJ Open

## What Happens after Menopause? (WHAM): Protocol for a prospective multicentre, age-matched cohort trial of risk-reducing bilateral salpingo-oophorectomy in high-risk premenopausal women

|                                 |                                                                                                                                                                                                                                                                                                                                                                                                                                                                                                                                                                                                          |
|---------------------------------|----------------------------------------------------------------------------------------------------------------------------------------------------------------------------------------------------------------------------------------------------------------------------------------------------------------------------------------------------------------------------------------------------------------------------------------------------------------------------------------------------------------------------------------------------------------------------------------------------------|
| Journal:                        | <i>BMJ Open</i>                                                                                                                                                                                                                                                                                                                                                                                                                                                                                                                                                                                          |
| Manuscript ID                   | bmjopen-2017-018758.R1                                                                                                                                                                                                                                                                                                                                                                                                                                                                                                                                                                                   |
| Article Type:                   | Protocol                                                                                                                                                                                                                                                                                                                                                                                                                                                                                                                                                                                                 |
| Date Submitted by the Author:   | 30-Sep-2017                                                                                                                                                                                                                                                                                                                                                                                                                                                                                                                                                                                              |
| Complete List of Authors:       | Hickey, Martha ; University of Melbourne, Obstetrics & Gynaecology Trainer, Alison; University of Melbourne, Department of Medicine; Peter MacCallum Cancer Institute<br>Braat, Sabine ; University of Melbourne School of Population and Global Health, Centre for Epidemiology and Biostatistics<br>Davey, Mary-Ann; Monash University Central Clinical School, Obstetrics & Gynaecology, Monash Health<br>Krejany, Efrosinia; Royal Women's Hospital, Gynaecology Research Centre<br>Wark, John; University of Melbourne, Department of Medicine; Royal Melbourne Hospital, Bone and Mineral Medicine |
| <b>Primary Subject Heading</b>: | Obstetrics and gynaecology                                                                                                                                                                                                                                                                                                                                                                                                                                                                                                                                                                               |
| Secondary Subject Heading:      | Obstetrics and gynaecology                                                                                                                                                                                                                                                                                                                                                                                                                                                                                                                                                                               |
| Keywords:                       | Menopause, Ovarian cancer, RRBSO                                                                                                                                                                                                                                                                                                                                                                                                                                                                                                                                                                         |
|                                 |                                                                                                                                                                                                                                                                                                                                                                                                                                                                                                                                                                                                          |

SCHOLARONE™  
Manuscripts

1  
2  
3 **What Happens after Menopause? (WHAM): Protocol for a prospective multicentre, age-**  
4 **matched cohort trial of risk-reducing bilateral salpingo-oophorectomy in high-risk**  
5 **premenopausal women**  
6

7 **AUTHORS AND AUTHOR INFORMATION**  
8

9 M Hickey MD, Department of Obstetrics and Gynaecology, University of Melbourne and the Royal  
10 Women's Hospital, Victoria, Australia. hickeym@unimelb.edu.au  
11

12 Alison H. Trainer MBChB, PhD, Parkville Familial Cancer Centre, Peter MacCallum Cancer Centre  
13 and University of Melbourne Department of Medicine.  
14

15 Sabine Braat MSc, Melbourne School of Population and Global Health and Melbourne Clinical and  
16 Translational Sciences (MCATS), University of Melbourne, Parkville, Australia  
17

18 Mary-Ann Davey DrPH, Department of Obstetrics and Gynaecology, Monash University  
19

20 EO Krejany MSc, Gynaecology Research Centre, The Royal Women's Hospital, Victoria, Australia  
21

22 John D Wark PhD, University of Melbourne Department of Medicine and Bone and Mineral  
23 Medicine, Royal Melbourne Hospital, Victoria, Australia  
24

25 **Acknowledgements**  
26

27 This study is supported by an NHMRC Project Grant (APP1048023) and by the Australia and New  
28 Zealand Gynaecological Oncology Group. M Hickey is supported by an NHMRC Practitioner  
29 Fellowship APP1058935. Thanks to clinicians at the recruiting sites: Dr Judy Kirk, Associate  
30 Professor Alison Brand, Dr Lesley Andrews, Associate Professor Trevor Tejana-Berges, Dr David  
31 Wrede.  
32

33 **Funding Statement**  
34

35 This study is supported by an NHMRC Project Grant (APP1048023) and by the Australia and New  
36 Zealand Gynaecological Oncology Group. M Hickey is supported by an NHMRC Practitioner  
37 Fellowship APP1058935.  
38

39 **Correspondence to:**  
40

41 M Hickey  
42

43 hickeym@unimelb.edu.au  
44  
45

46 **Contributors**  
47

48 MH, AT, SB, MAD, EOK and JW contributed to the conception, design, writing and editing of the  
49 protocol. MH drafted the manuscript and all other authors contributed to the final version. SB wrote  
50 the statistical methods. MH is the guarantor. All authors read and approved the final manuscript.  
51

52 **Competing interests**  
53

54 None.  
55  
56  
57  
58  
59  
60

### Ethics approvals

| Country, State      | HREC Name                                                             | HREC Reference # | Project #        | Approval Date |
|---------------------|-----------------------------------------------------------------------|------------------|------------------|---------------|
| Australia, Victoria | Peter MacCallum Cancer Centre                                         | HREC/12/PMCC/24  | 12/90            | 04/12/2012    |
| Australia, Victoria | The Royal Women's Hospital                                            | HREC/12/PMCC/24  | 12/07            | 20/12/2012    |
| Australia, Victoria | Melbourne Health                                                      | HREC/12/PMCC/24  | 2013/060         | 07/10/2013    |
| Australia, NSW      | South Eastern Sydney Local Health District (Prince of Wales Hospital) | HREC/13/POWH/61  | 12/304           | 23/05/2013    |
| Australia, NSW      | Western Sydney Local Health District                                  | HREC/13/POWH/61  | SSA/13/WMEAD/189 | 28/11/2013    |
| Australia, NSW      | South Eastern Sydney Local Health District (Royal Hospital for Women) | HREC/13/POWH/61  | 14/G/146         | 29/04/2014    |
| Australia, NSW      | Sydney Local Health District (Royal Prince Alfred Hospital)           | X14-0396         | 10/21            | 22/04/2015    |
| Australia, NSW      | Chris O'Brien Lifehouse                                               | X14-0396         | LH15/035         | 10/08/2015    |

**Provenance and peer review. Not commissioned; externally peer reviewed.**

**Data sharing statement:** It is the intention of the study group that once completed and the research articles stemming from the study have been published, any remaining data that is fully anonymised and not sensitive should be made open access.

Word Count: 4421

**Conflict of Interest declaration.** No conflict of interest to declare.

### Abstract

**Introduction:** Women at high inherited risk of ovarian cancer are advised to undergo risk-reducing bilateral salpingo-oophorectomy (RRBSO) at age 40-45 years or when their families are complete. Most women are premenopausal at this age, so RRBSO will induce surgical menopause. Despite the clear benefits of RRBSO for cancer risk reduction, much less is known about the impact on non-cancer outcomes which contribute to health and wellbeing and inform surveillance and management strategies.

**Methods and analysis:** This will be a multicentre, prospective cohort study of 105 premenopausal high-risk women undergoing RRBSO and an age-matched comparison group of 105 premenopausal women not planning oophorectomy or pregnancy in the next two years. The aim of this study is to measure the impact of RRBSO on sexual function (primary outcome) at 24 months in high-risk premenopausal women compared to the comparison group. Secondary outcomes include menopausal symptoms and menopause-related quality of life (QOL), mood, sleep quality, markers of cardiovascular disease and prediabetes, bone density and markers of bone turnover and the impact of hormone replacement therapy (HRT) use on these outcomes. Data analysis methods will include logistic and linear regression using general estimating equations accounting for the repeated outcome measurements within each participant.



Ethics and dissemination: The study has been approved by institutional ethics committees at each participating centre. Findings will be disseminated through peer reviewed publications and conference presentations, national and international networks of centres managing high-risk women and will inform national and international clinical guidelines.

Registration details: The trial is registered ([anzctr.org.au](http://anzctr.org.au); Registration No: ACTRN12615000082505)

#### Strengths and Limitations

- Increasing numbers of women are being diagnosed with gene mutations that increase their risk of ovarian cancer. Currently, risk-reducing salpingo-oophorectomy (RRBSO) is the only evidence-based intervention to reduce ovarian cancer risk in this population. Since risk-reducing oophorectomy is recommended before age 45 years it will generally induce surgical menopause.
- Although surgical menopause for risk-reduction and other gynaecological indications is relatively common in clinical practice, there have been very few prospective studies of non-cancer outcomes. This will be the largest prospective study of non-cancer outcomes following surgical menopause internationally and will provide new evidence to inform patient decision making, clinical management and follow-up protocols.
- A strength of this study is the prospective design and the inclusion of an age-matched control population to account for the impact of age on the outcomes to be studied.
- Whilst the study is adequately powered to address the primary outcome of sexual function, it will have less power to determine the impact of hormone replacement therapy (HRT) on the outcomes of interest.
- Further potential limitations are the use of hormonal contraceptives (such as COCP) at baseline in participants and the difficulty in recruiting an age-matched control population. To address this we have included multiple and integrated modes of recruitment across a number of centres.

#### Introduction

Ovarian cancer is the fifth most common female cancer and carries a poor prognosis. Around 10-15% of ovarian cancers, and over 20% in women under age 50 are due to germline mutations in the BRCA1 or BRCA2 gene<sup>1</sup>. These women have an elevated lifetime risk of breast (72% and 69% respectively) and ovarian cancer (44% and 17% respectively)<sup>2</sup> compared to the population risk of 1-5% for ovarian cancer. Other germline mutations such as the mismatch repair genes responsible for Lynch Syndrome increase ovarian cancer risk to around 9%<sup>3</sup>. The prevalence of germline gene mutations which increase the risk of ovarian cancer is up to 1:400 women and these cancers commonly develop at an earlier age than in the general population<sup>2</sup>. The wider availability of rapid, low-cost sequencing methods and the increasing indications for gene testing mean that more women are being diagnosed with germline mutations which increase their risk of ovarian cancer.

There is currently no effective screening strategy for ovarian cancer and the only intervention proven to reduce risk is bilateral salpingo-oophorectomy (RRBSO). Extensive evidence confirms that RRBSO reduces the risk of ovarian cancer by up to 95% in high-risk women and leads to an overall survival benefit<sup>4</sup>. RRBSO may also detect occult ovarian cancer. Current guidelines advise RRBSO before aged 40 in BRCA1 carriers or before aged 45 for BRCA2 carriers<sup>5</sup>.

Despite strong evidence that bilateral salpingo-oophorectomy reduces cancer risk and increases survival in high-risk women, many women decline to undergo risk-reducing surgery. Reported uptake rates vary considerably from around 17%-89%<sup>6</sup>. The reasons why many women decline or defer RRBSO are not well understood, but concerns about early menopause are a factor in premenopausal women<sup>7</sup>. Deleterious gene mutations are commonly identified when women are still premenopausal, so RRBSO will lead to surgical menopause. Despite the clear benefits for cancer risk reduction in high-risk women, very little is known about the impact of RRBSO on non-cancer outcomes<sup>8</sup> and this is of concern to high-risk women and their health care providers<sup>9</sup>. In the general population, there is growing evidence that early menopause (<45 years), and particularly surgical menopause has significant negative consequences for coronary heart disease<sup>10</sup>, cardiovascular death, all cause-

1  
2  
3 mortality, dementia and Parkinson's disease, particularly for those who do not take hormone  
4 replacement therapy HRT<sup>11 12</sup>. However, the quality of current evidence is low, and there have been  
5 very few prospective studies of surgical menopause in any population.  
6

7 High-risk women considering RRBSO are faced with complex decision-making, weighing up the  
8 potential adverse health implications of bilateral oophorectomy against the known reduction in cancer  
9 risk<sup>5</sup>. Most studies of RRBSO have focused exclusively on cancer outcomes, but current evidence  
10 suggests that premenopausal women experience a significant worsening of vasomotor symptoms (hot  
11 flushes and night sweats), a persistent decline in menopause-related quality of life and sexual function  
12 one year after RRBSO<sup>13</sup>. HRT partly mitigates these symptoms, but even in HRT users sexual  
13 function and vaginal symptoms do not return to pre-surgical levels<sup>14 15</sup>. Use of HRT is thought to be  
14 safe in high-risk women, provided they do not have a personal history of breast cancer, but the  
15 proportion of users is unknown and evidence for safety is limited<sup>16</sup>.  
16

17 Bilateral salpingo-oophorectomy leads to infertility, and women may consider undergoing concurrent  
18 hysterectomy. Hysterectomy adds to the duration, cost and potential complications of surgery, but  
19 avoids the need for combined HRT and removes the risk of endometrial pathology associated with  
20 tamoxifen use<sup>17</sup>. More information is needed from prospective studies to inform women and their  
21 health care providers considering hysterectomy at the time of RRBSO.  
22

23 To support informed decision making and to appropriately structure follow-up care there is an unmet  
24 need for prospective data on the non-cancer consequences of RRBSO<sup>5</sup>. Having reduced their risks of  
25 breast and ovarian cancer, high-risk women should reasonably anticipate a normal QOL and life  
26 expectancy. In order to decide whether and when to undergo RRBSO, and how best to optimise health  
27 post-operatively, more information is needed about the non-cancer consequences of risk-reducing  
28 oophorectomy.  
29

30 This multicentre, population-based, controlled, cohort study will generate new data to inform decision  
31 making around RRBSO and evidence-based follow-up care in the general population following  
32 surgical menopause. The primary objective of WHAM is to assess the association between RRBSO  
33 and sexual function as measured by the Female Sexual Function Index. The secondary outcomes are  
34 menopausal symptoms and menopause-related quality of life, mental health, bone health and turnover,  
35 cardiometabolic risk and sleep quality. We hypothesise that RRBSO in premenopausal women will  
36 reduce sexual function (primary outcome), increase menopausal symptoms, reduce menopause-related  
37 QOL, increase bone turnover, reduce bone density, increase cardiometabolic risk and reduce sleep  
38 quality compared to age-matched premenopausal women who retain their ovaries. We do not expect  
39 RRBSO to affect mental health<sup>18</sup>.  
40

## 41 **Methods: Participants and Outcomes**

### 42 **Study design and setting**

43  
44 This is a multicentre, cohort study comparing 105 high-risk pre-menopausal women up to 50 years of  
45 age who plan to undergo RRBSO with 105 age-matched, premenopausal women who do not plan to  
46 undergo oophorectomy or pregnancy in the next two years. Study recruitment commenced in April  
47 2013 and is ongoing, enrolling women from 8 public and 4 private hospitals in Australia (Victoria and  
48 New South Wales). The projected timeline for recruitment is 3-4 years. All subjects will be followed  
49 up for two years from the baseline visit.  
50  
51

### 52 **Eligibility criteria and recruitment**

53  
54 Eligible women will be premenopausal and age up to 50 years with regular menstrual periods (if  
55 intact uterus), no vasomotor symptoms and an FSH (follicular stimulating hormone) level of <15IU/L  
56 on day 2-6 of the menstrual cycle. Exclusions include <3 months since pregnancy and lactation,  
57 abnormal uterine bleeding, or use of anti-estrogens such as tamoxifen.  
58  
59  
60

Exposed women are defined as those at high inherited risk of ovarian cancer due to confirmed presence of a gene mutation (carriers of BRCA1, BRCA2, BRIP1, RAD51C, Lynch Syndrome) or high familial risk of ovarian cancer and planning to undergo RRBSO. Those with a personal history of breast cancer will be included if they remain premenopausal and are not currently taking endocrine therapy. Participants will be recruited via clinician referrals from familial cancer, high-risk breast cancer and menopause clinics, referrals from public and private gynaecology oncologists and surgeons, and via targeted advertising through mainstream and electronic media (eg. newspaper and television reports, cancer registries, cancer support newsletters and websites). Each referral will be processed upon receipt and eligibility screening and subsequent recruitment will be scheduled to occur within 8 weeks prior to the RRBSO surgery date. The baseline visit will be scheduled for the early follicular phase (days 2-6) of the subject's menstrual cycle prior to RRBSO.

Women in the comparison group are defined as 1:1 individually age-matched (within +/- 5 years), pre-menopausal women who are not planning oophorectomy or pregnancy within the next 2 years. Comparison subjects can be low-risk or relatives of high-risk women who do not carry a gene mutation. The comparison group will be recruited via mainstream and electronic media advertising to the general public (eg. clinical research recruitment websites, hospital and university staff newsletters and websites), and by asking recruited cases to recommend the study to relatives and friends. Recruitment will be scheduled to occur during the early follicular phase (days 2-6) of the subject's menstrual cycle, and within the 8 weeks after eligibility screening. Women in the comparison group withdrawing prior to the 6-month follow-up will be replaced by women of similar baseline age.

### Participant timeline

A schedule of study assessments and measurements is presented in Table 1. After informed consent and eligibility, baseline data will be collected including obstetric, gynaecological, medical and surgical history, current medications, risk factors for fracture ([www.shef.ac.uk/FRAX](http://www.shef.ac.uk/FRAX)), risk factors for cardiovascular disease including blood pressure, circulating cholesterol and lipids and C-reactive protein ([www.heartfoundation.org.au/SiteCollectionDocuments/austcardiovascular-risk-charts.pdf](http://www.heartfoundation.org.au/SiteCollectionDocuments/austcardiovascular-risk-charts.pdf)), tobacco, drug and alcohol use, methods of contraception, methods of breast cancer surveillance, germline mutation type and family cancer history. In those with a history of breast cancer, stage and grade of tumour and treatment history will be recorded. Blood pressure, weight, height and waist-hip ratio will be measured and repeated at selected follow-up visits (see Table 1). A blood sample will be taken after an overnight fast to measure sex steroid concentrations, lipids, and cardiovascular risk factors which will be repeated at 1 and 2 years follow-up. A urine sample will be collected for comparison subjects to exclude pregnancy (see Table 1). Medications used in the 3 months prior to enrolment and throughout the 2 year follow-up period will be recorded and includes those related to bone health (calcium, vitamin D and anti-resorptive agents), depression, anxiety, HRT, non-hormonal treatments for vasomotor symptoms, contraception and insomnia. Adverse events (changes in physical and psychological health from baseline) will be monitored over the 2-year follow-up period. Questionnaires to measure sexual function, menopausal symptoms, menopause-related QOL, sleep quality, depression and anxiety will be administered at baseline and all post-baseline study visits (see Table 1). All participants will undergo DXA scans within 3 months of RRBSO (baseline) and again at 1 and 2-years post-baseline.

Participants will be free to withdraw at any time, either through formal revocation of consent (patient preference) or via ceased communication with the recruitment site (lost to follow-up). All collected data will be included in the analyses and any discrepancies related to data collected prior to withdrawal will be queried with the subject up to one month after the withdrawal date. In order to minimise missing data, participants who cannot complete all scheduled visits will be invited to continue in the study despite missing visits. Those who withdraw at a scheduled time-point, or who are unable to attend the recruitment site at a scheduled time-point will be offered the opportunity to complete any time-point data that can be captured remotely via telephone and email correspondence, including questionnaire, medications and adverse events data.

## Outcomes

The primary outcome is the change in sexual function following RRBSO, as measured by the Female Sexual Function Index (FSFI)<sup>19</sup>. Sexual function was selected because it is a patient priority and in young women and because previous prospective studies suggest that sexual function may be permanently impaired following RRBSO<sup>13-15</sup>. Secondary outcomes include menopause-related QOL, menopausal symptoms, sleep quality, depression and anxiety, markers of cardiovascular disease and prediabetes, bone density and markers of bone turnover. All measures will be collected at baseline (prior to RRBSO in the intervention group) with follow-up measures scheduled as per Table 1.

## Measurement of sexual function

Subjects will be asked whether they currently have a sexual partner and whether sexual problems for the partner impact on their sexual activity. We will use standardized and validated questionnaires to measure three aspects of sexual function:

- 1) The Female Sexual Function Index (FSFI) is a widely-used brief self-report questionnaire that assesses six separate dimension: Desire, arousal, lubrication, orgasm, satisfaction, pain and it also provides a total score<sup>20</sup>. The FSFI has been validated in a large group of women with sexual arousal disorder versus age-matched controls<sup>19</sup> and in cancer survivors<sup>21</sup>. It has demonstrated a high level of acceptability, reliability and validity in both cancer and non-cancer populations<sup>22</sup>. The FSFI has a high internal consistency, test retest reliability and differentiates well between sexually-dysfunctional and non-dysfunctional women and is highly sensitive in discriminating between clinical and non-clinical populations<sup>20</sup>. FSFI scores (primary) will indicate which domains of sexual function are affected by RRBSO. The FSFI takes <5 minutes to complete.
- 2) The revised Female Sexual Distress Scale (FSDD-R)<sup>23</sup> is a brief (13 item) questionnaire which measures the extent to which reduced sexual desire causes distress in women. Distress is a key feature of hypoactive sexual desire disorder (HSDD). The (FSDD-R) has good discriminant validity, test-retest reliability, and internal consistency in measuring sex-related personal distress in women with HSDD<sup>24</sup>. The scale also has good content validity (relevance, clarity, comprehensiveness)<sup>25</sup>.
- 3) The Sexual Activity Questionnaire (SAQ) evaluates sexual pleasure (desire, enjoyment and satisfaction), discomfort (vaginal dryness and dyspareunia) and habit (frequency of sexual activity compared to usual activity)<sup>26</sup>. The SAQ has been validated in breast cancer patients and in high-risk women<sup>27</sup>. It is quick and easy to administer and has good face validity discriminating between the sexual functioning of pre- and post-menopausal women<sup>27</sup>.

## Measurement of circulating testosterone and SHBG

Circulating testosterone concentrations are reduced following RRBSO and this may contribute to sexual function, although findings are conflicting<sup>15</sup>. Circulating concentrations of total testosterone and the testosterone precursors, androstenedione and 5-dehydroepiandrosterone (DHEA) and sex hormone binding globulin (SHBG) will be measured at baseline and follow up, as per Table 1. Fasting blood samples will be immediately centrifuged to isolate plasma, and stored at -80 degrees centigrade. Because conventional radioimmunoassays lack sensitivity at low androgen concentrations found after surgical menopause<sup>28</sup> we will use liquid chromatography tandem mass spectrometry (LC-MS/MS), using a Sciex API 5500Q instrument by CPR Pharma Services (Adelaide, SA). The lower limit of measurement is 0.025 ng/mL for testosterone, 0.05 ng/mL for androstenedione, and 0.5 ng/mL for DHEA. The intra-assay coefficients of variation are low (<5%) at 1nM. SHBG concentrations will be measured using a non-competitive liquid-phase RIA (68562, Orion Diagnostica, Finland). We will calculate free testosterone concentrations using measured total testosterone and SHBG concentrations<sup>28</sup>.

### Measurement of menopausal symptoms and menopause-related quality of life

Menopausal symptoms will be measured using the Greene Climacteric Scale, which measures the frequency and severity of menopausal symptoms in psychological somatic and vasomotor domains<sup>29</sup>. The scale is widely used and has been validated in an Australian population<sup>30</sup>.

Menopause-related QOL will be measured using the Menopause-related Quality of Life Intervention (MENQOL-Intervention) questionnaire<sup>31</sup>. The MENQOL-intervention covers four domains; vasomotor, physical, psychosocial and sexual, and includes a global QOL life item. It is widely used internationally and its strength and validity have recently been confirmed in a large population-based sample of midlife women<sup>32</sup> and in breast cancer survivors<sup>33</sup>. The questionnaire tests the impact of an intervention, such as oophorectomy, on symptoms. Each takes less than five minutes to complete. Use of HRT and of non-hormonal medications for vasomotor symptoms will be recorded, and subjects will be asked about decision-making around HRT.

### Measurement of sleep quality

Sleep quality will be measured using the Pittsburgh Sleep Quality Index (PSQI)<sup>34</sup>, a widely used and validated measure of sleep quality<sup>35</sup>. The questionnaire measures subjective sleep quality, latency, duration, habitual sleep efficiency, sleep disturbances and medications, and daytime dysfunction. The PSQI takes <5 minutes to complete.

### Measurements of depression and anxiety

Depression and anxiety will be measured using the Centre for Epidemiologic Studies Depression (CES-D)<sup>36</sup> and the Generalized Anxiety Disorder (GAD-7)<sup>37</sup> scales, respectively. The CES-D measures the frequency of depressive feelings and behaviours experienced in the past week and includes 20 items that are assigned scores ranging from 0-3. The final CES-D score (0 – 60) is the sum of the 20 items and a score of  $\geq 16$  points is indicative of depression. The GAD-7 measures the frequency of GAD symptoms in the past fortnight and includes 7 items that are assigned scores ranging from 0-3. The final GAD-7 score (0 – 21) is the sum of the 7 items and a scores of 5-9, 10-14 and 15-21 are indicative of mild, moderate and severe anxiety respectively. Each questionnaire takes <5 minutes to complete.

### Measurement of cardiovascular disease risk

Resting blood pressure, weight, height and waist/hip ratio will be measured as per table 1. Fasting blood samples will be analysed for serum insulin, glucose, triglycerides (TG), cholesterol, high density lipoprotein (HDL-C), low density lipoprotein (LDL-C) and high sensitivity C-reactive protein (hs CRP) which predicts CVD in healthy women<sup>38</sup>. These have not previously been prospectively measured in surgical menopause. Homeostasis model assessment (HOMA) will be calculated by fasting insulin ( $\mu\text{U/ml}$ ) x fasting glucose (mM)]/22.5. Insulin resistance will be defined by a HOMA reading  $>488$ . The presence of diabetes or prediabetes will be established by fasting glucose and HbA1c. A HbA1c of  $>6.5\%$  will be used as a cut-off for the diagnosis of diabetes as recommended by the American Diabetes Association ([www.diabetes.org](http://www.diabetes.org)) and carried out in National Association of Testing Authorities (NATA) accredited laboratories using standard equipment.

### Measurement of bone density and markers of bone turnover

We will measure fasting serum albumin, creatinine, calcium and phosphate, circulating markers of bone turnover (beta-C-terminal telopeptide of type I collagen (beta CTX) and N-terminal propeptide of type I collagen)<sup>39</sup>. We will measure 25-OH vitamin D2 and D3 using LC tandem mass spectrometry and intact parathyroid hormone (PTH) immunoassay. The bone turnover markers are independent predictors of fracture risk and will supplement BMD data. Regional BMD (at the lumbar spine and hip) will be measured using dual-energy X-ray absorptiometry (DXA) within 3 months of RRBSO (baseline). We will also use DXA to measure total body bone mineral content (BMC) which will increase power to detect bone loss<sup>40</sup>. DXA measurement location will be included as a covariate and change from baseline will be used in outcome analyses. Fracture risk assessment using a FRAX tool ([www.shef.ac.uk/FRAX](http://www.shef.ac.uk/FRAX)), will only be applied to women aged over 40 years.

### Sample size

We will recruit 105 high-risk pre-menopausal women planning RRBSO and 105 age-matched ( $\pm 5$  years) women in the comparison group. The primary outcome is sexual dysfunction (FSFI score  $<26.55$ )<sup>41</sup> where lower FSFI scores indicate worse sexual function. Based on large population-based surveys, we have assumed that around 24% of premenopausal women will have sexual dysfunction (FSFI below clinical cut off) at baseline<sup>42 43</sup> and that the proportion with sexual dysfunction does not differ between the high-risk women or those in the comparison group, or between age groups, and that it does not change over the 2-year follow-up period in the comparison group. Sample size calculations are based on comparing the proportion of women with sexual dysfunction in the RRBSO group with

1  
2  
3 the comparison group at the two year follow-up. A sample size of 89 women per group will provide  
4 80% power at a two-sided 5% level of significance to detect a 21% difference (from 24% in the  
5 comparison group to 45% in the RRBSO group), or 105 per group when allowing for 15% loss to  
6 follow-up at 2-years. This difference in the proportion of women with sexual dysfunction is clinically  
7 significant<sup>44</sup>. For the secondary outcomes, this sample size of 89 per group will also provide 83%  
8 power to detect a difference in the proportion of women with a DXA T-score of  $\leq -1$  at 2 years, from  
9 16% in the comparison group to 36% in the RRBSO group<sup>45</sup> and 92% power to detect a mean  
10 difference between groups of 0.5 standard deviation in the MENQOL score.

## 11 12 **Methods: Data collection, management, and analysis**

### 13 14 **Data collection methods**

15  
16 Study data are being collected using paper case report forms (CRF), paper self-reported  
17 questionnaires, paper recorded phone interviews, and paper copies of biochemical, pathology and  
18 bone density imaging reports. These paper documents will be kept by each recruitment site in a locked  
19 cabinet accessible to local research staff only. All data will be entered and stored in a de-identified,  
20 password-protected electronic study database created with the REDCap<sup>®</sup> web application  
21 (<https://projectredcap.org/>)<sup>44</sup>. REDCap (Research Electronic Data Capture) is a secure, web-based  
22 application designed to support data capture for research studies, providing: 1) an intuitive interface  
23 for validated data entry; 2) audit trails for tracking data manipulation and export procedures; 3)  
24 automated export procedures for seamless data downloads to common statistical packages; and 4)  
25 procedures for importing data from external sources<sup>46</sup>. Internet access to the REDCap<sup>®</sup> database will  
26 utilise a secure server located at the University of Melbourne, Australia (REDCap<sup>®</sup> consortium host),  
27 and access will be limited to local research staff at each recruitment site. Research staff will only have  
28 access to the REDCap<sup>®</sup> data collected at their local recruitment site, whereas the chief investigator,  
29 project manager, data administrator and statistician will have access to all REDCap<sup>®</sup> data.

### 30 31 **Data management**

32  
33 Management of comprehensive and valid paper records will be the responsibility of local research  
34 staff at each recruitment site. To ensure a systematic approach to data collection the project manager  
35 will provide protocol training and written standard operating procedures to research staff prior to any  
36 study visits being performed. Data integrity will be maintained thorough review of all collected data  
37 prior to, during and after each study visit. Any time-sensitive data (eg. questionnaires) will be  
38 reviewed as soon as they are collected and any identified discrepancies will be resolved within one  
39 week of collection. Medications and adverse events data will be reviewed and consolidated at every  
40 study visit. All other data discrepancies will be queried with the subject via email or telephone  
41 correspondence and resolved within one month of collection. Records of participant screenings and  
42 enrolments at each site will be maintained using Microsoft Excel spreadsheets with diary features.  
43 These documents will assist research staff to adhere to study timelines and to regularly monitor and  
44 report site study progress to the project manager, investigators and the responsible HRECs. Electronic  
45 data entry into the REDCap<sup>®</sup> database will begin no later than 12 months prior to the last participant  
46 last visit. Database training of research staff and data entry will be conducted and overseen  
47 (respectively) by the project manager.

### 48 49 **Data and safety monitoring**

50  
51 We do not anticipate any study-related adverse events (AEs) or serious adverse events (SAEs). The  
52 only anticipated AEs include phlebotomy-related site injuries (minor) and vasovagal syncope (rarely),  
53 and negative psychological responses to questionnaires and interview discussions. These AEs will be  
54 circumvented or managed by providing the subject with appropriate advice and counselling during  
55 and after each study visit. Reports of biochemistry, pathology and bone density results will be  
56 routinely reviewed by medically-qualified site investigators. Any concerning results will be  
57 immediately reviewed and reported to the subject and her GP. All other results will be reviewed  
58  
59  
60

1  
2  
3 within one week of report receipt and any results outside of normal ranges will be reported to the  
4 subject's GP within 2 weeks. The project manager will directly monitor all Victorian data within one  
5 month of collection, and personally visit other recruitment sites on a 6-monthly basis to perform data  
6 monitoring activities. The outcomes will be reported to the chief investigator and all relevant research  
7 staff and investigators within one month of each monitoring visit, and any systematic problems with  
8 data collection, data management and adverse events monitoring and reporting will be rectified.  
9 Questionnaires will be independently scored on two separate occasions prior to data entry into the  
10 REDCap<sup>®</sup> database, and all data entry into REDCap<sup>®</sup> will be monitored by an independent data  
11 administrator. REDCap<sup>®</sup> data queries will be addressed by the project manager and data administrator  
12 using the REDCap<sup>®</sup> Data Resolution Workflow module.  
13

## 14 **Statistical methods**

15  
16 The analysis set will consist of all recruited women. Baseline characteristics will be summarised by  
17 group. The primary outcome is sexual dysfunction, defined as an FSFI score of <26.55 at 2 years.  
18 The primary outcome and binary secondary outcomes (e.g. PSQI score > 5; CES-D score  $\geq$  16;  
19 GAD-7  $\geq$  10, absolute change from baseline in diastolic blood pressure  $\geq$  5 mmHg, relative change  
20 from baseline in HDL:LDL ratio > 2.5, BMD T-score  $\leq$  -1) will be analysed by fitting a generalised  
21 linear model with a logistic link function using generalised estimation equations to account for the  
22 repeated measurements<sup>47</sup>. Continuous secondary outcomes including FSFI as a continuous outcome  
23 will be analysed by fitting a linear regression model using generalised estimating equations. The  
24 matching variable age-group will be including in the above models. Appropriate transformation of a  
25 continuous variable may be performed before analyses if the variable is found to be skewed. A  
26 directed acyclic graph will be used to explore which covariates to include in the adjusted -model<sup>48 49</sup>.  
27 An adjusted model will be fitted to correct for the potential confounding of time-independent  
28 covariates (e.g. use of hormonal contraception at baseline, use of antidepressant medication at  
29 baseline) and time-dependent covariates (e.g. symptoms of depression and/or anxiety). We anticipate  
30 that around one third of women will have concurrent hysterectomy at the time of RRBSO, that  
31 40% will take HRT following RRBSO, and that 10% of high-risk women will either have a history  
32 of breast cancer or will develop breast cancer over the follow-up period. In addition to the primary  
33 comparison of all RRBSO participants with all controls, we will compare outcomes between the  
34 three sub-groups (RRBSO  $\pm$  hysterectomy,  $\pm$ HRT,  $\pm$  breast cancer) with all controls.  
35  
36

37 The number and proportion of women using specific medication (e.g. HRT, antidepressants) will be  
38 summarised by group. Adverse events will be recorded and graded using the revised National Cancer  
39 Institute Common Terminology Criteria for Adverse Events (CTCAE) criteria and the number and  
40 proportion of women with at least one AE will be summarised by group. Exploratory subgroup  
41 analyses will examine whether the effect differs across the following subgroup categories a) age at  
42 baseline (<45 years vs  $\geq$ 45 years) and b) use of hormonal contraception at baseline (yes vs no) by  
43 adding the subgroup and its interaction with group to the model.  
44

## 45 **Outcomes and Significance**

46  
47 Growing numbers of women are known to be at high inherited risk of ovarian cancer and are electing  
48 to undergo RRBSO. The established reduction in ovarian cancer mortality following RRBSO could be  
49 further improved by minimizing the negative non-cancer consequences, which also may contribute to  
50 morbidity and all-cause mortality. This can be addressed only when the non-cancer outcomes are  
51 known, and this requires prospective data collection. The principal significance is high burden of  
52 disease from ovarian cancer and the growing number of high-risk women who would benefit from  
53 RRBSO. In addition, because prospective studies of surgical menopause in the general population are  
54 very limited, the findings from this study will also inform care of low-risk women undergoing  
55 surgical menopause. These data will be used to develop resources to support decision making around  
56 RRBSO including the timing of surgery, additional hysterectomy, preoperative risk assessment and  
57 counselling and post-operative follow-up including use of HRT. Our studies will directly improve  
58 cancer outcomes by impact on clinical practice and policy, through the development of  
59  
60



1  
2  
3 multidisciplinary evidence-based guidelines and screening protocols. Consumers have clearly  
4 indicated that they wish to be informed about the consequences of RRBSO and that current  
5 information provision and follow-up care are inadequate<sup>50 51</sup>. Decision making and satisfaction are  
6 improved when high-risk women are offered dedicated clinical services<sup>52 53</sup>. Our data and guidelines  
7 will provide a template for the care of other high-risk women considering RRBSO as new genes are  
8 identified. Improved information about the non-cancer consequences of RRBSO is unlikely to  
9 dissuade high-risk women from surgery. Despite side effects, most do not regret their choice<sup>18 50</sup>.  
10 Improved follow-up care may also improve QOL for high-risk women and contribute to early  
11 detection and/or prevention of conditions related to early menopause. This will be the first  
12 international multicentre, prospective study of non-cancer outcomes after RRBSO or surgical  
13 menopause in any population. Currently, there is no consensus on how high-risk women should be  
14 managed following RRBSO. This study will provide new evidence on which to develop evidence-  
15 based care for this growing population of women.  
16

### 17 **Ethics and Dissemination**

18  
19 This is a prospective observational cohort study of high-risk women undergoing RRBSO. No study-  
20 related safety concerns are anticipated. The study has been granted ethics approval at each of the  
21 participating recruitment centres, including:  
22

- 23 • Peter MacCallum Cancer Centre (Victoria, Australia)
- 24 • The Royal Women's Hospital (Victoria, Australia)
- 25 • The Royal Melbourne Hospital (Victoria, Australia)
- 26 • Prince of Wales Hospital (NSW, Australia)
- 27 • Westmead Hospital (NSW, Australia)
- 28 • Royal Hospital for Women (NSW, Australia)
- 29 • Royal Prince Alfred Hospital (NSW, Australia)
- 30 • Chris O'Brien Lifehouse (NSW, Australia)
- 31

32  
33 Dissemination will be through peer-reviewed publications, presentations at national and international  
34 conferences and existing networks including WISP, National and International Menopause societies  
35 and specialist colleges.  
36  
37  
38  
39  
40  
41  
42  
43  
44  
45  
46  
47  
48  
49  
50  
51  
52  
53  
54  
55  
56  
57  
58  
59  
60

Table 1: Schedule of Assessments / Investigations

| Study Procedures                                                                                                        | Baseline Day 1* (Visit 1) | Month 3 ±6 weeks (Visit 2) | Month 6 ±6 weeks (No Visit) | Month 12 ±6 weeks (Visit 3) | Month 24 ±6 weeks (Visit 4) |
|-------------------------------------------------------------------------------------------------------------------------|---------------------------|----------------------------|-----------------------------|-----------------------------|-----------------------------|
| Informed Consent and Eligibility                                                                                        | •                         |                            |                             |                             |                             |
| Surgical, Medical, Gynaecological, Obstetric and Menstrual History                                                      | •                         |                            |                             |                             |                             |
| Smoking, Drug and Alcohol Use History                                                                                   | •                         |                            |                             |                             |                             |
| Germline Mutation Testing History                                                                                       | •                         |                            |                             |                             |                             |
| Personal and Family Cancer History                                                                                      | •                         |                            |                             |                             |                             |
| Personal Breast Cancer Surveillance, Diagnosis, Treatment Details (if applicable)                                       | •                         |                            |                             |                             |                             |
| Contraceptive Methods                                                                                                   | •                         |                            |                             |                             |                             |
| Fracture Risk Assessment #<br>( <a href="http://www.shef.ac.uk/FRAX/tool.jsp">http://www.shef.ac.uk/FRAX/tool.jsp</a> ) | •                         |                            |                             |                             |                             |
| Height                                                                                                                  | •                         |                            |                             |                             |                             |
| Weight                                                                                                                  | •                         |                            |                             | •                           | •                           |
| Waist-Hip Ratio ( <a href="http://bupa.com.au/">http://bupa.com.au/</a> )                                               | •                         |                            |                             | •                           | •                           |
| Blood Pressure                                                                                                          | •                         | •                          |                             | •                           | •                           |
| Urinary Pregnancy Test (Comparisons Only)                                                                               | •                         | •                          |                             | •                           | •                           |
| Medications                                                                                                             | •                         | •                          | •                           | •                           | •                           |
| Adverse Events                                                                                                          |                           | •                          | •                           | •                           | •                           |
| <b>Questionnaires</b>                                                                                                   |                           |                            |                             |                             |                             |
| FSFI, FSFS-R and SAQ (Sexual function, distress and activity)                                                           | •                         | •                          | •                           | •                           | •                           |
| GCS and MENQOL (Menopausal Symptoms and QOL)                                                                            | •                         | •                          | •                           | •                           | •                           |
| PSQI (Sleep Quality)                                                                                                    | •                         | •                          | •                           | •                           | •                           |
| CES-D (Depression) and GAD-7 (Anxiety)                                                                                  | •                         | •                          | •                           | •                           | •                           |
| <b>Blood Tests (Fasting)</b>                                                                                            |                           |                            |                             |                             |                             |
| FSH, Estradiol (days 2-6 menstrual cycle)                                                                               | •                         |                            |                             |                             |                             |
| Total Testosterone, DHEAS, Androstenedione, SHBG                                                                        | •                         |                            |                             | •                           | •                           |
| Total Cholesterol, LDL-C, HDL-C, Triglycerides, Insulin, Glucose, HbA1c, CRP                                            | •                         |                            |                             | •                           | •                           |
| Albumin, Creatinine, Calcium, Phosphate, PINP, BCTX, Parathyroid Hormone, Vitamin D                                     | •                         |                            |                             | •                           | •                           |
| <b>Bone Mineral Density (BMD)</b>                                                                                       |                           |                            |                             |                             |                             |
| DXA Scans of Hip and Lumbar Spine BMD and of Total Body Bone Mineral Content (BMC)                                      |                           | •                          |                             | •                           | •                           |

\* The baseline visit will be performed up to 8 weeks prior to RRBSO for the intervention group, or following eligibility screening for controls.

# The FRAX tool will only be applied to women aged over 40 years at baseline.

## References

1. Alsop K, Fereday S, Meldrum C, et al. BRCA mutation frequency and patterns of treatment response in BRCA mutation-positive women with ovarian cancer: a report from the Australian Ovarian Cancer Study Group. *Journal of clinical oncology : official journal of the American Society of Clinical Oncology* 2012;30(21):2654-63. doi: 10.1200/jco.2011.39.8545 [published Online First: 2012/06/20]
2. Kuchenbaecker KB, Hopper JL, Barnes DR, et al. Risks of Breast, Ovarian, and Contralateral Breast Cancer for BRCA1 and BRCA2 Mutation Carriers. *Jama* 2017;317(23):2402-16. doi: 10.1001/jama.2017.7112 [published Online First: 2017/06/21]
3. Bonadona V, Bonaïti B, Olschwang S, Grandjouan S, Huiart L, Longy M, Guimbaud R, Buecher B, Bignon Y.J, Caron O, Colas C, Noguès C, Lejeune-Dumoulin S, Olivier-Faivre L, Polycarpe-Osaer F, Nguyen T.D, Desseigne F, Saurin J.C, Berthet P, Leroux D, Duffour J, Manouvrier S, Frébourg T, Sobol H, Lasset C, Bonaïti-Pellié C; French Cancer Genetics Network. Cancer risks associated with germline mutations in MLH1, MSH2, and MSH6 genes in Lynch syndrome. *Jama* 2011;305(22):2304-10.
4. Marchetti C, De Felice F, Palaia I, et al. Risk-reducing salpingo-oophorectomy: a meta-analysis on impact on ovarian cancer risk and all cause mortality in BRCA 1 and BRCA 2 mutation carriers. *BMC women's health* 2014;14:150. doi: 10.1186/s12905-014-0150-5 [published Online First: 2014/12/17]
5. Hartmann LC, Lindor NM. The Role of Risk-Reducing Surgery in Hereditary Breast and Ovarian Cancer. *The New England journal of medicine* 2016;374(5):454-68. doi: 10.1056/NEJMra1503523 [published Online First: 2016/02/04]
6. Sidon L, Ingham S, Clancy T, Clayton R, Clarke A, Jones E.A, Lalloo F, Evans D.G. Uptake of risk-reducing salpingo-oophorectomy in women carrying a BRCA1 or BRCA2 mutation: evidence for lower uptake in women affected by breast cancer and older women. *Br J Cancer* 2012;106(4):775-9.
7. Mai PL, Piedmonte M, Han PK, et al. Factors associated with deciding between risk-reducing salpingo-oophorectomy and ovarian cancer screening among high-risk women enrolled in GOG-0199: An NRG Oncology/Gynecologic Oncology Group study. *Gynecologic oncology* 2017;145(1):122-29. doi: 10.1016/j.ygyno.2017.02.008 [published Online First: 2017/02/14]
8. Cohen JV, Chiel L, Boghossian L, et al. Non-cancer endpoints in BRCA1/2 carriers after risk-reducing salpingo-oophorectomy. *Familial cancer* 2012;11(1):69-75. doi: 10.1007/s10689-011-9480-8 [published Online First: 2011/09/08]
9. Miller SM, Roussi P, Daly MB, et al. New strategies in ovarian cancer: uptake and experience of women at high risk of ovarian cancer who are considering risk-reducing salpingo-oophorectomy. *Clin Cancer Res* 2010;16(21):5094-106.
10. Mytton J, Evison F, Chilton PJ, et al. Removal of all ovarian tissue versus conserving ovarian tissue at time of hysterectomy in premenopausal patients with benign disease: study using routine data and data linkage. *BMJ (Clinical research ed)* 2017;356:j372. doi: 10.1136/bmj.j372 [published Online First: 2017/02/09]
11. Rocca WA, Gazzuola-Rocca L, Smith CY, et al. Accelerated Accumulation of Multimorbidity After Bilateral Oophorectomy: A Population-Based Cohort Study. *Mayo Clinic proceedings* 2016;91(11):1577-89. doi: 10.1016/j.mayocp.2016.08.002 [published Online First: 2016/10/04]

- 1  
2  
3 12. Evans EC, Matteson KA, Orejuela FJ, et al. Salpingo-oophorectomy at the Time of Benign  
4 Hysterectomy: A Systematic Review. *Obstetrics and gynecology* 2016;128(3):476-85. doi:  
5 10.1097/aog.0000000000001592 [published Online First: 2016/08/09]  
6
- 7 13. Finch A, Metcalfe KA, Chiang JK, et al. The impact of prophylactic salpingo-oophorectomy on  
8 menopausal symptoms and sexual function in women who carry a BRCA mutation. *Gynecologic*  
9 *oncology* 2011;121(1):163-8. doi: 10.1016/j.ygyno.2010.12.326 [published Online First: 2011/01/11]  
10
- 11 14. Johansen N, Liavaag AH, Tanbo TG, et al. Sexual activity and functioning after risk-reducing  
12 salpingo-oophorectomy: Impact of hormone replacement therapy. *Gynecologic oncology*  
13 2016;140(1):101-6. doi: 10.1016/j.ygyno.2015.11.016 [published Online First: 2015/11/26]  
14
- 15 15. Tucker PE, Bulsara MK, Salfinger SG, et al. Prevalence of sexual dysfunction after risk-reducing  
16 salpingo-oophorectomy. *Gynecologic oncology* 2016;140(1):95-100. doi:  
17 10.1016/j.ygyno.2015.11.002 [published Online First: 2015/11/08]  
18
- 19 16. Domchek S, Kaunitz AM. Use of systemic hormone therapy in BRCA mutation carriers.  
20 *Menopause (New York, NY)* 2016;23(9):1026-7. doi: 10.1097/gme.0000000000000724 [published  
21 Online First: 2016/08/10]  
22
- 23 17. Shu CA, Pike MC, Jotwani AR, et al. Uterine Cancer After Risk-Reducing Salpingo-  
24 oophorectomy Without Hysterectomy in Women With BRCA Mutations. *JAMA oncology*  
25 2016;2(11):1434-40. doi: 10.1001/jamaoncol.2016.1820 [published Online First: 2016/07/02]  
26
- 27 18. Finch A, Metcalfe KA, Chiang J, et al. The impact of prophylactic salpingo-oophorectomy on  
28 quality of life and psychological distress in women with a BRCA mutation. *Psycho-oncology*  
29 2013;22(1):212-9. doi: 10.1002/pon.2041 [published Online First: 2011/09/14]  
30
- 31 19. Rosen R, Brown C, Heiman J, et al. The Female Sexual Function Index (FSFI): a  
32 multidimensional self-report instrument for the assessment of female sexual function. *Journal of sex*  
33 *& marital therapy* 2000;26(2):191-208. [published Online First: 2000/04/27]  
34
- 35 20. Meston C, M., Derogatis, L.R. Validated instruments for assessing female sexual dysfunction. *J*  
36 *Sex Mar Ther* 2002;28s:155-64.  
37
- 38 21. Baser RE, Li, Y., Carter, J. Psychometric validation of the Female Sexual Function Index (FSFI)  
39 in cancer survivors. *Cancer* 2012;10.1002/cncr.26739. [Epub ahead of print]  
40
- 41 22. Bartula I, Sherman KA. The Female Sexual Functioning Index (FSFI): evaluation of acceptability,  
42 reliability, and validity in women with breast cancer. *Supportive care in cancer : official journal of*  
43 *the Multinational Association of Supportive Care in Cancer* 2015;23(9):2633-41. doi:  
44 10.1007/s00520-015-2623-y [published Online First: 2015/02/12]  
45
- 46 23. Derogatis LR, Rosen R, Leiblum S, et al. The Female Sexual Distress Scale (FSDS): initial  
47 validation of a standardized scale for assessment of sexually related personal distress in women.  
48 *Journal of sex & marital therapy* 2002;28(4):317-30. [published Online First: 2002/06/27]  
49
- 50 24. Derogatis L, Clayton, A., Lewis-D'Agostino, D., Wunderlich, G., Fu, Y. Validation of the female  
51 sexual distress scale-revised for assessing distress in women with hypoactive sexual desire disorder.  
52 *J Sex Med* 2008;5(2):357-64.  
53
- 54 25. DeRogatis L, Pyke, R., McCormack, J., Hunter, A., Harding, G. Does the Female Sexual Distress  
55 Scale-Revised cover the feelings of women with HSDD? *J Sex Med* 2011;8(10):2810-5.  
56  
57  
58  
59  
60

- 1  
2  
3 26. Thirlaway K, Fallowfield, L., Cuzick, J. The Sexual Activity Questionnaire: a measure of  
4 women's sexual functioning. *Qual Life Res* 1996;5(1):81-90.  
5  
6 27. Atkins L, Fallowfield, L.J. Fallowfield's Sexual Activity Questionnaire in women with without  
7 and at risk of cancer. *Menopause Int* 2007;13(3):103-9.  
8  
9 28. Vermeulen A, Verdonck L, Kaufman JM. A critical evaluation of simple methods for the  
10 estimation of free testosterone in serum. *The Journal of clinical endocrinology and metabolism*  
11 1999;84(10):3666-72. [published Online First: 1999/10/16]  
12  
13 29. Greene J. Constructing a standard climacteric scale. *Maturitas* 1998;29:25-31.  
14  
15 30. Travers C, O'Neill SM, King R, et al. Greene Climacteric Scale: norms in an Australian  
16 population in relation to age and menopausal status. *Climacteric : the journal of the International*  
17 *Menopause Society* 2005;8(1):56-62. doi: RG4214038686512N [pii]  
18 10.1080/13697130400013443 [published Online First: 2005/04/05]  
19  
20 31. Lewis JE, Hilditch, J.R., Wong, C.J. Further psychometric property development of the  
21 Menopause-Specific Quality of Life questionnaire and development of a modified version,  
22 MENQOL-Intervention questionnaire. *Maturitas* 2005;50(3):209-21.  
23  
24 32. Van Dole KB, Devellis, R.F., Brown, R.D., Jonsson Funk, M.L., Gaynes, B.N., Williams, R.E.  
25 Evaluation of the Menopause-Specific Quality of Life Questionnaire: a factor-analytic approach.  
26 *Menopause (New York, NY)* 2012;19(2):211-5.  
27  
28 33. Radtke JV, Terhorst, L., Cohen, S.M. The Menopause-Specific Quality of Life Questionnaire:  
29 psychometric evaluation among breast cancer survivors. *Menopause (New York, NY)* 2011;18(3):289-  
30 95.  
31  
32 34. Buysse DJ RCr, Monk TH, Berman SR, Kupfer DJ. The Pittsburgh Sleep Quality Index: a new  
33 instrument for psychiatric practice and research. *Psychiatry Res* 1989;28(2):193-213.  
34  
35 35. Backhaus J, Junghanns, K., Broocks, A., Riemann, D., Hohagen, F. Test-retest reliability and  
36 validity of the Pittsburgh Sleep Quality Index in primary insomnia. *J Psychosom Res* 2002;53(3):737-  
37 40.  
38  
39 36. Myers JK, Weissman MM. Use of a self-report symptom scale to detect depression in a  
40 community sample. *The American journal of psychiatry* 1980;137(9):1081-4. doi:  
41 10.1176/ajp.137.9.1081 [published Online First: 1980/09/01]  
42  
43 37. Spitzer R, . L; Kroenke, K., Williams, J.B.W, Bernd Löwe, D.S.W A Brief Measure for Assessing  
44 Generalized Anxiety Disorder. *Arch Intern Med* 1996;166(10):1092-97.  
45  
46 38. Buckley DI, Fu R, Freeman M, et al. C-reactive protein as a risk factor for coronary heart disease:  
47 a systematic review and meta-analyses for the U.S. Preventive Services Task Force. *Annals of internal*  
48 *medicine* 2009;151(7):483-95. [published Online First: 2009/10/07]  
49  
50 39. Seibel MJ. Biochemical markers of bone turnover part II: clinical applications in the management  
51 of osteoporosis. *Clin Biochem Rev* 2006;27(3):123-38.  
52  
53 40. MacInnis RJ, Cassar, C., Nowson, C.A., Paton, L.M., Flicker, L., Hopper, J.L., Larkins, R.G.,  
54 Wark, J.D. Determinants of bone density in 30- to 65-year-old women: a co-twin study. *J Bone Miner*  
55 *Res* 2003;18(9):1650-6.  
56  
57  
58  
59  
60

- 1  
2  
3 41. Wiegel M, Meston C, Rosen R. The female sexual function index (FSFI): cross-validation and  
4 development of clinical cutoff scores. *Journal of sex & marital therapy* 2005;31(1):1-20. doi:  
5 10.1080/00926230590475206 [published Online First: 2005/04/22]  
6  
7 42. West SL, D'Aloisio AA, Agans RP, et al. Prevalence of low sexual desire and hypoactive sexual  
8 desire disorder in a nationally representative sample of US women. *Archives of internal medicine*  
9 2008;168(13):1441-9. doi: 10.1001/archinte.168.13.1441 [published Online First: 2008/07/16]  
10  
11 43. Lammerink EAG, de Bock GH, Pascal A, et al. A Survey of Female Sexual Functioning in the  
12 General Dutch Population. *The journal of sexual medicine* 2017;14(7):937-49. doi:  
13 10.1016/j.jsxm.2017.04.676 [published Online First: 2017/07/05]  
14  
15 44. Leiblum SR, Koochaki, P.E., Rodenberg, C.A., Barton, I.P., Rosen, R.C. Hypoactive sexual desire  
16 disorder in postmenopausal women: US results from the Women's International Study of Health and  
17 Sexuality (WISHeS). *Menopause* 2006;13(1):46-56.  
18  
19 45. Challberg J, Ashcroft L, Lalloo F, et al. Menopausal symptoms and bone health in women  
20 undertaking risk reducing bilateral salpingo-oophorectomy: significant bone health issues in those not  
21 taking HRT. *British journal of cancer* 2011;105(1):22-7. doi: 10.1038/bjc.2011.202 [published Online  
22 First: 2011/06/10]  
23  
24 46. Harris PA, Taylor R, Thielke R, et al. Research electronic data capture (REDCap)--a metadata-  
25 driven methodology and workflow process for providing translational research informatics support.  
26 *Journal of biomedical informatics* 2009;42(2):377-81. doi: 10.1016/j.jbi.2008.08.010 [published  
27 Online First: 2008/10/22]  
28  
29 47. Zeger SL, Liang KY, Albert PS. Models for longitudinal data: a generalized estimating equation  
30 approach. *Biometrics* 1988;44(4):1049-60. [published Online First: 1988/12/01]  
31  
32 48. Shrier I, Platt RW. Reducing bias through directed acyclic graphs. *BMC medical research*  
33 *methodology* 2008;8:70. doi: 10.1186/1471-2288-8-70 [published Online First: 2008/11/01]  
34  
35 49. Hernan MA, Hernandez-Diaz S, Werler MM, et al. Causal knowledge as a prerequisite for  
36 confounding evaluation: an application to birth defects epidemiology. *American journal of*  
37 *epidemiology* 2002;155(2):176-84. [published Online First: 2002/01/16]  
38  
39 50. Campfield Bonadies D, Moyer, A., Matloff, E.T. What I wish I'd known before surgery: BRCA  
40 carriers' perspectives after bilateral salpingo-oophorectomy. *Familial cancer* 2010;10(1):79-85.  
41  
42 51. Hallowell N, Mackay, J., Richards, M., Gore, M., Jacobs, I. High-risk premenopausal women's  
43 experiences of undergoing prophylactic oophorectomy: a descriptive study. *Genet Test* 2004;8(2):148-  
44 56.  
45  
46 52. Firth C, Jacobs, C., Evison, M., Pichert, G., Izatt, L., Hunter, M.S. Novel one-stop  
47 multidisciplinary follow-up clinic for BRCA1/2 carriers: patient satisfaction and decision making.  
48 *Psycho-oncology* 2011;20(12):1301-8.  
49  
50 53. Harmsen MG, Arts-de Jong M, Horstik K, et al. Very high uptake of risk-reducing salpingo-  
51 oophorectomy in BRCA1/2 mutation carriers: A single-center experience. *Gynecologic oncology*  
52 2016;143(1):113-9. doi: 10.1016/j.ygyno.2016.07.104 [published Online First: 2016/07/20]  
53  
54  
55  
56  
57  
58  
59  
60

## STROBE Statement—checklist of items that should be included in reports of observational studies

|                              | Item No | Recommendation                                                                                                                                                                                                                                                                                                                                                                                                                                                         | Page No |
|------------------------------|---------|------------------------------------------------------------------------------------------------------------------------------------------------------------------------------------------------------------------------------------------------------------------------------------------------------------------------------------------------------------------------------------------------------------------------------------------------------------------------|---------|
| <b>Title and abstract</b>    | 1       | (a) Indicate the study's design with a commonly used term in the title or the abstract                                                                                                                                                                                                                                                                                                                                                                                 | 1       |
|                              |         | (b) Provide in the abstract an informative and balanced summary of what was done and what was found                                                                                                                                                                                                                                                                                                                                                                    | 2       |
| <b>Introduction</b>          |         |                                                                                                                                                                                                                                                                                                                                                                                                                                                                        |         |
| Background/rationale         | 2       | Explain the scientific background and rationale for the investigation being reported                                                                                                                                                                                                                                                                                                                                                                                   | 3       |
| Objectives                   | 3       | State specific objectives, including any prespecified hypotheses                                                                                                                                                                                                                                                                                                                                                                                                       | 4       |
| <b>Methods</b>               |         |                                                                                                                                                                                                                                                                                                                                                                                                                                                                        |         |
| Study design                 | 4       | Present key elements of study design early in the paper                                                                                                                                                                                                                                                                                                                                                                                                                | 4       |
| Setting                      | 5       | Describe the setting, locations, and relevant dates, including periods of recruitment, exposure, follow-up, and data collection                                                                                                                                                                                                                                                                                                                                        | 4       |
| Participants                 | 6       | (a) <i>Cohort study</i> —Give the eligibility criteria, and the sources and methods of selection of participants. Describe methods of follow-up<br><i>Case-control study</i> —Give the eligibility criteria, and the sources and methods of case ascertainment and control selection. Give the rationale for the choice of cases and controls<br><i>Cross-sectional study</i> —Give the eligibility criteria, and the sources and methods of selection of participants | 4-5     |
|                              |         | (b) <i>Cohort study</i> —For matched studies, give matching criteria and number of exposed and unexposed<br><i>Case-control study</i> —For matched studies, give matching criteria and the number of controls per case                                                                                                                                                                                                                                                 | 5       |
| Variables                    | 7       | Clearly define all outcomes, exposures, predictors, potential confounders, and effect modifiers. Give diagnostic criteria, if applicable                                                                                                                                                                                                                                                                                                                               | 6       |
| Data sources/<br>measurement | 8*      | For each variable of interest, give sources of data and details of methods of assessment (measurement). Describe comparability of assessment methods if there is more than one group                                                                                                                                                                                                                                                                                   | 6-8     |
| Bias                         | 9       | Describe any efforts to address potential sources of bias                                                                                                                                                                                                                                                                                                                                                                                                              | 8       |
| Study size                   | 10      | Explain how the study size was arrived at                                                                                                                                                                                                                                                                                                                                                                                                                              | 8       |
| Quantitative<br>variables    | 11      | Explain how quantitative variables were handled in the analyses. If applicable, describe which groupings were chosen and why                                                                                                                                                                                                                                                                                                                                           | 9       |
| Statistical methods          | 12      | (a) Describe all statistical methods, including those used to control for confounding                                                                                                                                                                                                                                                                                                                                                                                  | 10      |
|                              |         | (b) Describe any methods used to examine subgroups and interactions                                                                                                                                                                                                                                                                                                                                                                                                    | 10      |
|                              |         | (c) Explain how missing data were addressed                                                                                                                                                                                                                                                                                                                                                                                                                            | 10      |
|                              |         | (d) <i>Cohort study</i> —If applicable, explain how loss to follow-up was addressed<br><i>Case-control study</i> —If applicable, explain how matching of cases and controls was addressed<br><i>Cross-sectional study</i> —If applicable, describe analytical methods taking account of sampling strategy                                                                                                                                                              | 10      |
|                              |         | (e) Describe any sensitivity analyses                                                                                                                                                                                                                                                                                                                                                                                                                                  | 10      |

Continued on next page

**Results Checklist not applicable – this is a Study Protocol submission****Results**

|                  |     |                                                                                                                                                                                                                                                                                                                                                                                                               |
|------------------|-----|---------------------------------------------------------------------------------------------------------------------------------------------------------------------------------------------------------------------------------------------------------------------------------------------------------------------------------------------------------------------------------------------------------------|
| Participants     | 13* | (a) Report numbers of individuals at each stage of study—eg numbers potentially eligible, examined for eligibility, confirmed eligible, included in the study, completing follow-up, and analysed<br>(b) Give reasons for non-participation at each stage<br>(c) Consider use of a flow diagram                                                                                                               |
| Descriptive data | 14* | (a) Give characteristics of study participants (eg demographic, clinical, social) and information on exposures and potential confounders<br>(b) Indicate number of participants with missing data for each variable of interest<br>(c) <i>Cohort study</i> —Summarise follow-up time (eg, average and total amount)                                                                                           |
| Outcome data     | 15* | <i>Cohort study</i> —Report numbers of outcome events or summary measures over time<br><i>Case-control study</i> —Report numbers in each exposure category, or summary measures of exposure<br><i>Cross-sectional study</i> —Report numbers of outcome events or summary measures                                                                                                                             |
| Main results     | 16  | (a) Give unadjusted estimates and, if applicable, confounder-adjusted estimates and their precision (eg, 95% confidence interval). Make clear which confounders were adjusted for and why they were included<br>(b) Report category boundaries when continuous variables were categorized<br>(c) If relevant, consider translating estimates of relative risk into absolute risk for a meaningful time period |
| Other analyses   | 17  | Report other analyses done—eg analyses of subgroups and interactions, and sensitivity analyses                                                                                                                                                                                                                                                                                                                |

**Discussion**

|                  |    |                                                                                                                                                                            |
|------------------|----|----------------------------------------------------------------------------------------------------------------------------------------------------------------------------|
| Key results      | 18 | Summarise key results with reference to study objectives                                                                                                                   |
| Limitations      | 19 | Discuss limitations of the study, taking into account sources of potential bias or imprecision. Discuss both direction and magnitude of any potential bias                 |
| Interpretation   | 20 | Give a cautious overall interpretation of results considering objectives, limitations, multiplicity of analyses, results from similar studies, and other relevant evidence |
| Generalisability | 21 | Discuss the generalisability (external validity) of the study results                                                                                                      |

**Other information**

|         |    |                                                                                                                                                               |
|---------|----|---------------------------------------------------------------------------------------------------------------------------------------------------------------|
| Funding | 22 | Give the source of funding and the role of the funders for the present study and, if applicable, for the original study on which the present article is based |
|---------|----|---------------------------------------------------------------------------------------------------------------------------------------------------------------|

\*Give information separately for cases and controls in case-control studies and, if applicable, for exposed and unexposed groups in cohort and cross-sectional studies.

**Note:** An Explanation and Elaboration article discusses each checklist item and gives methodological background and published examples of transparent reporting. The STROBE checklist is best used in conjunction with this article (freely available on the Web sites of PLoS Medicine at <http://www.plosmedicine.org/>, Annals of Internal Medicine at <http://www.annals.org/>, and Epidemiology at <http://www.epidem.com/>). Information on the STROBE Initiative is available at [www.strobe-statement.org](http://www.strobe-statement.org).
